# Supplementary material for: Transcriptional Proposition for Uniquely Developed Protocorm Flowering in Three Orchid Species: Resources for Innovative Breeding
Source: Front Plant Sci. 2022 Jun 28;13:942591. doi: 10.3389/fpls.2022.942591 (PMC9275812; doi:10.3389/fpls.2022.942591)
Supplement: Supplementary file 1 [file Data_Sheet_1.xlsx]

## Sheet: Sheet1
	Supplementary Table 1 The statistics of total and clean read transcriptome data
Sample	Total Raw Reads (M)	Total Clean Reads (M)	Total Clean Bases(Gb)	Clean Reads Q20(%)	Clean Reads Q30(%)	Clean Reads Ratio(%)
R_Cen_Fl	67.68	63.87	6.39	97.5	90.03	94.36
R_Cen_Le_1	67.62	63.46	6.35	97.37	89.53	93.84
R_Cgo_Fl_1	71.09	66.8	6.68	97.33	89.38	93.96
R_Cgo_Le	69.69	65.05	6.5	97.28	89.22	93.34
R_Csi_Fl_1	70.19	66.22	6.62	97.46	89.84	94.34
R_Csi_Le_2	70.19	66.12	6.61	97.34	89.45	94.2

## Sheet: Sheet2
	Supplementary Table 2 The total number of TFs differentially expressed among 6 tissues
Gene ID	Family	Included Domain	Excluded Domain	Cen_F FPKM	Cen_L FPKM	Cgo_F FPKM	Cgo_L FPKM	Csi_F FPKM	Csi_L FPKM
JL018367	ABI3VP1	B3	AP2,Auxin_resp	1.66	12.42	1.92	0.68	2.6	13.61
BGI_novel_G006975	ABI3VP1	B3	AP2,Auxin_resp	16.64	15.98	29.22	24.78	29.5	23.4
JL009607	ABI3VP1	B3	AP2,Auxin_resp	12.54	15.65	13.73	12.55	20.56	16.5
JL026093	ABI3VP1	B3	AP2,Auxin_resp	43.21	1.03	0.14	2.42	0.46	0.46
JL001761	ABI3VP1	B3	AP2,Auxin_resp	26.71	40.47	26.75	25.43	31.32	35.95
JL017118	ABI3VP1	B3	AP2,Auxin_resp	21.9	45.29	38.14	35.04	37.45	39.81
JL018784	ABI3VP1	B3	AP2,Auxin_resp	23.22	34.35	22.84	17.46	23.95	18.39
JL011640	ABI3VP1	B3	AP2,Auxin_resp	19.92	29.23	17.25	20.62	41.91	27.87
JL020703	ABI3VP1	B3	AP2,Auxin_resp	0.04	0.52	0.28	0.24	4.24	0.89
BGI_novel_G005781	ABI3VP1	B3	AP2,Auxin_resp	0.41	0.62	2.02	1.12	0.31	1.44
JL003725	ABI3VP1	B3	AP2,Auxin_resp	6.81	5.26	10.15	9.21	9.62	8.65
JL013350	ABI3VP1	B3	AP2,Auxin_resp	7.84	12.77	10.03	14.19	6.53	13
JL019877	ABI3VP1	B3	AP2,Auxin_resp	18.14	31.79	15.47	17.39	17.78	25.38
JL000366	ABI3VP1	B3	AP2,Auxin_resp	3.9	21.08	9.62	3.53	30.4	16.07
JL013506	ABI3VP1	B3	AP2,Auxin_resp	11.98	55.17	22.38	10.6	45.91	75.23
BGI_novel_G002986	ABI3VP1	B3	AP2,Auxin_resp	0.5	2	1.63	1.58	4.24	2.22
JL001119	ABI3VP1	B3	AP2,Auxin_resp	5.55	0.07	46.6	15.98	24.92	25.42
JL016018	ABI3VP1	B3	AP2,Auxin_resp	0	0.64	0.14	2.45	0.09	4.43
JL021345	ABI3VP1	B3	AP2,Auxin_resp	0.04	2.13	0	0.09	3.45	1.4
JL001332	ABI3VP1	B3	AP2,Auxin_resp	5.42	24.52	11.8	12.29	9.54	18.91
JL000178	ABI3VP1	B3	AP2,Auxin_resp	7.25	10.77	8.34	8.7	12.61	5.53
JL010170	ABI3VP1	B3	AP2,Auxin_resp	2.32	2.24	1.42	3.76	2.58	3.22
JL007689	Alfin-like	Alfin-like	DDT,Homeobox,JmjC,JmjN	0.18	0	0.14	0	0.64	0.09
JL024947	Alfin-like	Alfin-like	DDT,Homeobox,JmjC,JmjN	8.25	12.48	10.69	13.5	15.3	9.84
JL015776	Alfin-like	Alfin-like	DDT,Homeobox,JmjC,JmjN	6.89	7.76	8.8	10.78	5.75	4.78
BGI_novel_G009703	Alfin-like	Alfin-like	DDT,Homeobox,JmjC,JmjN	2.28	2.42	1.84	1.39	3.91	3.11
JL017062	Alfin-like	Alfin-like	DDT,Homeobox,JmjC,JmjN	20.51	17.73	24	22.78	36.09	27.67
JL003807	Alfin-like	Alfin-like	DDT,Homeobox,JmjC,JmjN	15.43	10.92	11.68	19.16	9.46	29.99
JL022197	Alfin-like	Alfin-like	DDT,Homeobox,JmjC,JmjN	12.67	25.76	8.52	9.55	30.96	16.86
BGI_novel_G009705	Alfin-like	Alfin-like	DDT,Homeobox,JmjC,JmjN	0	0.62	1.06	2.14	0.48	0
JL019768	Alfin-like	Alfin-like	DDT,Homeobox,JmjC,JmjN	54.21	51.65	52.32	44.45	21.34	27.64
BGI_novel_G006861	Alfin-like	Alfin-like	DDT,Homeobox,JmjC,JmjN	3.54	5.88	4.93	5.39	5.08	4.91
BGI_novel_G007749	Alfin-like	Alfin-like	DDT,Homeobox,JmjC,JmjN	2.92	3.72	6.39	6.16	8.69	7.59
JL000943	Alfin-like	Alfin-like	DDT,Homeobox,JmjC,JmjN	38.85	43.08	45.39	42.1	37.13	35.55
JL010091	Alfin-like	Alfin-like	DDT,Homeobox,JmjC,JmjN	20.17	32.58	26.25	20.54	26.54	22.76
JL005965	Alfin-like	Alfin-like	DDT,Homeobox,JmjC,JmjN	17.6	24.48	20.12	18.75	18.59	19.51
JL004219	Alfin-like	Alfin-like	DDT,Homeobox,JmjC,JmjN	29.39	39.14	38.23	30.9	44.9	34.89
JL020046	Alfin-like	Alfin-like	DDT,Homeobox,JmjC,JmjN	23.36	34.16	30.2	44.04	40.65	28.93
JL024889	Alfin-like	Alfin-like	DDT,Homeobox,JmjC,JmjN	3.27	1.89	2.44	3.67	6.52	3.29
JL025184	Alfin-like	Alfin-like	DDT,Homeobox,JmjC,JmjN	102.65	223.98	118.45	138.69	178.4	160.11
JL003622	Alfin-like	Alfin-like	DDT,Homeobox,JmjC,JmjN	7.21	9.46	8.56	7.68	14.61	11.07
JL012330	AP2-EREBP	AP2	-	18.78	5.46	32.72	6.13	30.77	5.74
JL002942	AP2-EREBP	AP2	-	571.98	327.31	628.2	294.53	365.87	311.78
JL024579	AP2-EREBP	AP2	-	23.83	11.44	7.51	2.91	3	8.04
JL010341	AP2-EREBP	AP2	-	1.03	1.21	0.21	0.8	0.64	0.3
JL002148	AP2-EREBP	AP2	-	13.54	8.85	15.53	13.65	11.47	10.62
JL007954	AP2-EREBP	AP2	-	52.5	3.55	3.28	1.92	0.2	3.66
JL007533	AP2-EREBP	AP2	-	19.28	0.95	0.1	0.96	1.29	1.59
BGI_novel_G009871	AP2-EREBP	AP2	-	0.52	0.13	0.75	1.95	4.69	1.58
JL002502	AP2-EREBP	AP2	-	4.28	9.98	10.43	8.71	5.84	9.29
JL018248	AP2-EREBP	AP2	-	0.1	11.17	0	0.21	0	0.1
JL000999	AP2-EREBP	AP2	-	327.45	428.42	179.39	355.92	138.71	189.58
JL000867	AP2-EREBP	AP2	-	12.49	2.28	1.83	2.31	0.94	1.3
BGI_novel_G007313	AP2-EREBP	AP2	-	0	0	1.32	1.21	1.26	1.12
JL022366	AP2-EREBP	AP2	-	16.2	30.28	19.26	14.34	11.09	15.2
JL019882	AP2-EREBP	AP2	-	43.2	4.52	18.04	2.25	1.23	7.89
BGI_novel_G007312	AP2-EREBP	AP2	-	5.05	3.01	2.02	5.22	3.4	2.97
JL016842	AP2-EREBP	AP2	-	2.41	14.65	1.69	0.65	5.03	0.8
JL015467	AP2-EREBP	AP2	-	323.45	101.26	112.34	120.05	19.29	149.61
JL005272	AP2-EREBP	AP2	-	0.15	0	0.97	0.17	25.63	1.61
JL000404	AP2-EREBP	AP2	-	0	32.01	0	0.06	0.02	4.73
JL006155	AP2-EREBP	AP2	-	1.89	8.77	1.13	0.26	2.89	4.71
JL020859	AP2-EREBP	AP2	-	613.93	489.53	333.75	379.83	77.03	189.7
JL029250	AP2-EREBP	AP2	-	17.53	42.98	42.19	1.11	14.25	67.1
JL015538	AP2-EREBP	AP2	-	56.41	65.07	43.85	95.3	117.45	82.66
JL005017	AP2-EREBP	AP2	-	227.84	8.94	31.59	8.76	2.03	18.62
JL023974	AP2-EREBP	AP2	-	27.5	13	5.53	12.18	10.25	13.94
JL000337	AP2-EREBP	AP2	-	104.97	68.33	84.41	66.96	13.34	37.33
JL010829	AP2-EREBP	AP2	-	213.13	99.92	69.58	34.73	28.83	33.67
JL019396	AP2-EREBP	AP2	-	52.4	23.55	91.09	71.19	19.76	34.48
JL016191	AP2-EREBP	AP2	-	0.06	0.44	0.06	0.11	3.11	7.01
JL017147	AP2-EREBP	AP2	-	34.75	8.97	71.17	50.75	75.42	8.16
JL003676	AP2-EREBP	AP2	-	16.05	17.58	23.96	22.81	19.74	13.18
JL024985	AP2-EREBP	AP2	-	719.02	210.63	100.49	167.5	31.95	150.55
JL015107	AP2-EREBP	AP2	-	3.45	4.95	3.04	2.73	8.93	5.07
JL004256	AP2-EREBP	AP2	-	19.67	0.34	0.7	0.14	8.19	1.95
JL022307	AP2-EREBP	AP2	-	26.72	9.36	15.68	14.83	11.06	17.33
JL017347	AP2-EREBP	AP2	-	0.13	0.88	0.04	1.3	2.09	21.87
JL025420	AP2-EREBP	AP2	-	34.91	0.93	0.52	0.54	1.58	0.61
JL017586	AP2-EREBP	AP2	-	70.83	75.03	116.05	163.01	59.79	98.58
JL022640	AP2-EREBP	AP2	-	38.4	21.28	23.11	28.09	12.95	18.61
BGI_novel_G011413	AP2-EREBP	AP2	-	25.62	80.54	30.36	0.64	14.32	80.03
BGI_novel_G001986	AP2-EREBP	AP2	-	0.33	9.17	0	0.2	0.07	1.44
BGI_novel_G002076	AP2-EREBP	AP2	-	18.01	2.42	2.06	2.65	0.18	0.12
JL012217	AP2-EREBP	AP2	-	51.18	14.56	3.58	3.6	1.61	2.49
JL006156	AP2-EREBP	AP2	-	557.43	241.62	87.47	151.08	31.75	79.62
JL005977	AP2-EREBP	AP2	-	106.47	67.68	79.65	67.6	70.34	63.2
BGI_novel_G007317	AP2-EREBP	AP2	-	2.85	3.18	0	0	0	0
JL007904	AP2-EREBP	AP2	-	98.22	55.18	21.03	105.86	6.22	143.23
JL003557	AP2-EREBP	AP2	-	303.48	253.36	261.61	305.63	76.8	263.74
JL021235	AP2-EREBP	AP2	-	510.18	269.6	84.33	40.25	10.44	39.93
JL002751	AP2-EREBP	AP2	-	4.86	6.05	3.87	3.83	3.14	3.32
JL000953	AP2-EREBP	AP2	-	400.97	146.12	74.98	47.09	50.34	71.21
BGI_novel_G006952	AP2-EREBP	AP2	-	1.13	1.82	8.63	5.69	1.56	2.31
JL012421	AP2-EREBP	AP2	-	1.19	12.42	0.45	0.78	4.29	4.9
JL012411	AP2-EREBP	AP2	-	67.55	29.91	12.07	13.17	5.24	11.27
JL009884	AP2-EREBP	AP2	-	2.34	3.09	3.66	2.89	13.4	2.4
JL007290	AP2-EREBP	AP2	-	96.29	242.75	53.4	33.32	48.49	79.06
JL013511	AP2-EREBP	AP2	-	21.19	2.43	5.06	6.83	0.47	0.36
JL009066	AP2-EREBP	AP2	-	1.25	0.78	0.72	1.79	0.28	0.57
JL015979	AP2-EREBP	AP2	-	0.16	9.35	2.86	6.42	25.39	14.96
JL017585	AP2-EREBP	AP2	-	10.05	0	0	53.95	5.53	13.1
BGI_novel_G000825	AP2-EREBP	AP2	-	89.33	45.29	62.33	95.62	12.07	49.47
JL010358	AP2-EREBP	AP2	-	49.8	0.83	0.58	0.24	11.65	0.45
BGI_novel_G007315	AP2-EREBP	AP2	-	0	3.15	0.96	0	0	0
JL004255	AP2-EREBP	AP2	-	3.5	0.03	0	0.14	2.27	0.28
JL023361	AP2-EREBP	AP2	-	14.21	27.05	13.11	28.67	26.81	37.96
BGI_novel_G000823	AP2-EREBP	AP2	-	89.33	45.29	62.33	95.62	12.07	49.47
JL012296	AP2-EREBP	AP2	-	0.51	2.31	0	0	0.77	0
JL015923	AP2-EREBP	AP2	-	0.17	2.91	0.07	0.16	5.99	6
JL004745	AP2-EREBP	AP2	-	36.17	0.41	1.11	2.42	0.19	4.98
JL023815	AP2-EREBP	AP2	-	14.94	1.4	2.39	1.35	0.85	0.23
JL002501	AP2-EREBP	AP2	-	18.82	14.08	28.39	32.13	21.59	43.2
JL003457	AP2-EREBP	AP2	-	37.68	28.63	38.91	22.3	48.11	33.33
BGI_novel_G006805	AP2-EREBP	AP2	-	0.48	0.33	0.08	0.61	0.65	2.28
JL007261	AP2-EREBP	AP2	-	117.46	8.22	1.88	0.61	0.2	4.42
JL022821	AP2-EREBP	AP2	-	0.08	0.51	0.06	0.37	0.08	2.86
JL000341	AP2-EREBP	AP2	-	75.53	127.43	26.6	22.28	16.27	36.01
JL000604	AP2-EREBP	AP2	-	0.36	174.47	0.08	0.12	8.84	7.91
JL010041	AP2-EREBP	AP2	-	0	6.65	0	0	0.16	2.68
JL001612	AP2-EREBP	AP2	-	235.76	93.97	37.67	55.77	7.99	23.35
BGI_novel_G011412	AP2-EREBP	AP2	-	0	0	0	0	13.76	66.08
JL011616	AP2-EREBP	AP2	-	129.73	2.82	17.26	5.41	2.56	23.44
JL006076	AP2-EREBP	AP2	-	19.05	1.08	15.32	6.26	0.38	2.16
JL006872	AP2-EREBP	AP2	-	3.18	12.74	4.63	0.95	19.96	6.29
JL008370	AP2-EREBP	AP2	-	1.01	6.25	3.62	2.23	10.59	2.64
BGI_novel_G007314	AP2-EREBP	AP2	-	0	3.15	0.96	0	0	0
BGI_novel_G000824	AP2-EREBP	AP2	-	89.33	45.29	62.33	95.62	12.07	49.47
JL012599	AP2-EREBP	AP2	-	0	0.43	0.8	0.09	13.76	6.93
JL001580	AP2-EREBP	AP2	-	0.38	2.91	0.79	0.06	3.8	0.32
JL003505	AP2-EREBP	AP2	-	22.05	0.32	23.88	9.04	1.83	4.05
JL019379	AP2-EREBP	AP2	-	0.04	0.71	0.65	0.05	16.12	1.88
JL007534	AP2-EREBP	AP2	-	6.54	0.54	0	0.11	0	0.31
JL019024	AP2-EREBP	AP2	-	0.93	1.66	4.11	0.51	10.27	4.9
JL020185	AP2-EREBP	AP2	-	4.96	3.72	2.61	1.42	0.82	4.47
JL003101	AP2-EREBP	AP2	-	0.07	0	0.09	0	5.95	0.33
JL016377	AP2-EREBP	AP2	-	4.48	17.7	0.63	3.89	5.01	17.41
JL023814	AP2-EREBP	AP2	-	2.75	0.22	0.34	0.25	0	0
JL013512	AP2-EREBP	AP2	-	69.01	189.01	4.41	8.42	5.73	27.8
BGI_novel_G004307	AP2-EREBP	AP2	-	280.32	11.34	5.78	3.26	3.15	12.56
JL002817	AP2-EREBP	AP2	-	89.76	1.46	46.73	0.09	2.4	5.96
JL004253	AP2-EREBP	AP2	-	12.37	0.71	1.03	0.3	0.66	0.72
JL004990	AP2-EREBP	AP2	-	2.33	12.81	9.57	3.46	4.79	21.43
JL006112	AP2-EREBP	AP2	-	12.69	13.3	7.06	13.03	19.35	18.25
JL012936	ARF	Auxin_resp	-	60.34	121.01	88.38	49.88	61.05	36.44
BGI_novel_G002993	ARF	Auxin_resp	-	0	0	6.76	0.39	4.93	4.69
BGI_novel_G002988	ARF	Auxin_resp	-	4.78	13.38	5.14	4.68	3.73	2.18
BGI_novel_G000873	ARF	Auxin_resp	-	9.66	10.9	8.71	3.15	9.7	6.87
JL011358	ARF	Auxin_resp	-	0.28	2.22	3.08	0.54	8.28	7.61
BGI_novel_G008153	ARF	Auxin_resp	-	0	15.14	0	0	0	0
JL016447	ARF	Auxin_resp	-	12.8	5.9	13.84	27.12	11.13	24.9
BGI_novel_G002989	ARF	Auxin_resp	-	4.53	0	4.78	0	10.85	0
BGI_novel_G002996	ARF	Auxin_resp	-	0	0.33	1.59	2.49	6.34	3.13
BGI_novel_G006301	ARF	Auxin_resp	-	0	0.47	0.67	0.07	2.96	1.58
BGI_novel_G002992	ARF	Auxin_resp	-	3.4	7.61	3.7	3.28	6.48	2.27
BGI_novel_G008149	ARF	Auxin_resp	-	1.51	2.6	1.57	1.22	1.18	0
BGI_novel_G000857	ARF	Auxin_resp	-	16.43	5.89	28.5	5.9	119.9	70.01
JL001482	ARF	Auxin_resp	-	70.56	41.08	54.73	64.85	57.9	59.73
JL016038	ARF	Auxin_resp	-	44.48	91.32	120.87	49.41	113.52	71.87
BGI_novel_G000858	ARF	Auxin_resp	-	2.35	3.05	3.86	3.18	7.04	4.42
BGI_novel_G002995	ARF	Auxin_resp	-	0	0.33	1.59	2.49	6.34	3.13
BGI_novel_G008148	ARF	Auxin_resp	-	9.93	1.12	12.97	26.87	11.55	10.5
JL012830	ARF	Auxin_resp	-	6.73	31.99	15.51	6.39	25.07	40.58
BGI_novel_G000860	ARF	Auxin_resp	-	12.06	14.77	32.91	15.52	0.01	10.02
JL018886	ARF	Auxin_resp	-	48.77	51.13	58.4	71.37	51.46	50.89
JL018192	ARF	Auxin_resp	-	0.87	17.32	7.87	2.86	13.86	20.2
JL006064	ARF	Auxin_resp	-	100.06	55.23	48.59	100.49	58.23	87.06
BGI_novel_G002999	ARF	Auxin_resp	-	0.24	0.62	0.22	0.86	0.2	0.43
JL018338	ARF	Auxin_resp	-	20.67	49.83	13.91	22.15	16.29	14.51
BGI_novel_G008154	ARF	Auxin_resp	-	0	0	0	0	0	2.04
BGI_novel_G002994	ARF	Auxin_resp	-	1.53	7.92	3.61	12.42	16.86	16.92
JL007590	ARF	Auxin_resp	-	22.14	20.73	33.28	20.38	93.09	44.45
BGI_novel_G000859	ARF	Auxin_resp	-	2.35	3.05	3.86	3.18	7.04	4.42
BGI_novel_G000872	ARF	Auxin_resp	-	9.66	10.9	8.71	3.15	9.7	6.87
JL020726	ARF	Auxin_resp	-	41.62	41.33	25.42	22.36	16.29	22.59
BGI_novel_G002990	ARF	Auxin_resp	-	3.25	3.17	0	0	0	0.72
BGI_novel_G002987	ARF	Auxin_resp	-	12.77	48.97	14.79	20.27	30.06	27.58
JL008782	ARF	Auxin_resp	-	67.22	37.24	33.9	26.54	86.29	47.44
JL002108	ARR-B	G2-like,Myb_DNA-binding,Response_reg	CCT	20.07	29.9	20.04	23.55	21.12	20.94
BGI_novel_G001884	ARR-B	G2-like,Myb_DNA-binding,Response_reg	CCT	0.47	2.84	0.08	0.06	0	0
JL010835	ARR-B	G2-like,Myb_DNA-binding,Response_reg	CCT	71	101.68	102.07	71.65	63.14	50.26
JL022560	ARR-B	G2-like,Myb_DNA-binding,Response_reg	CCT	2.63	9.65	8.71	3.31	6.77	3.26
JL023352	ARR-B	G2-like,Myb_DNA-binding,Response_reg	CCT	0.33	5.83	0.14	1.51	0.12	2.74
BGI_novel_G001882	ARR-B	G2-like,Myb_DNA-binding,Response_reg	CCT	4.24	6.3	4.3	4.02	6.87	6.82
JL018030	BBR/BPC	GAGA_bind	-	17.07	20.53	21.26	20.66	21.4	28.05
JL011550	BBR/BPC	GAGA_bind	-	10.99	24.62	9.43	21.31	14.05	17.14
JL004940	BBR/BPC	GAGA_bind	-	25.63	42.99	30.34	32.96	30.6	26.65
JL000737	BES1	DUF822	-	22.56	15.92	23.97	27.56	20.51	24.44
JL021058	BES1	DUF822	-	29.69	11.43	54.01	161.26	14.84	72.14
JL015952	BES1	DUF822	-	20.73	18.97	22.54	16.02	29.95	21.51
JL009496	BES1	DUF822	-	7.85	9.64	10.19	15.43	12.77	10.81
JL018204	BES1	DUF822	-	0.11	0.83	0.46	1.98	3.22	3.19
JL001827	BES1	DUF822	-	182.83	75.41	39.06	22	106.97	79.72
JL015720	BES1	DUF822	-	29.14	49.44	20.4	23.6	49.2	31.3
JL018063	BES1	DUF822	-	20.29	35.62	29.01	50.86	42.75	87.39
BGI_novel_G000957	bHLH	HLH	-	0	0.08	0	0	5.2	0
JL019665	bHLH	HLH	-	9.94	16.54	1.65	1.83	20.8	2.74
JL005918	bHLH	HLH	-	11.42	34.56	36.36	38.04	30.42	36.85
JL014617	bHLH	HLH	-	22.61	23.08	11.03	11.14	7.46	14.34
JL022491	bHLH	HLH	-	0.05	0.98	0.1	0	8.04	11.06
JL015331	bHLH	HLH	-	38.64	5.38	71.22	92.59	7.3	69.45
JL009349	bHLH	HLH	-	1.06	7.24	1.31	0.17	5.16	2.53
JL001833	bHLH	HLH	-	14.89	2.35	7.04	3.2	1.58	2.12
JL002237	bHLH	HLH	-	25.73	17.91	16.74	27.64	15.86	21.88
JL003146	bHLH	HLH	-	0.1	0.66	6.82	5.38	0.77	7.89
JL006529	bHLH	HLH	-	0.39	0	0.23	0	2.61	0
BGI_novel_G011062	bHLH	HLH	-	16.59	10.5	5.32	10.85	4.94	6.84
JL008101	bHLH	HLH	-	8.94	20.79	28.54	5.47	67.03	22.1
BGI_novel_G011058	bHLH	HLH	-	0	0	3.27	0	0	0
JL018138	bHLH	HLH	-	3.75	31.78	11.6	5.78	8.91	37.49
BGI_novel_G000387	bHLH	HLH	-	25.57	25	25.76	40.79	9.94	25.13
JL004046	bHLH	HLH	-	16.15	15.08	13.21	13.86	14.34	16.23
JL020701	bHLH	HLH	-	5.53	20.5	8.41	6	49.72	28.49
BGI_novel_G011041	bHLH	HLH	-	0	0	0	0	3.47	1.75
JL021462	bHLH	HLH	-	52.59	24.41	25.44	31.19	17.85	17.07
JL006665	bHLH	HLH	-	26.4	37.68	24.89	36.54	26.74	34.66
JL024961	bHLH	HLH	-	2.01	41.78	12.49	2.77	64.68	10.8
JL021575	bHLH	HLH	-	7.66	18	7.35	2.65	23.97	17.93
JL014421	bHLH	HLH	-	65.1	75.17	121.78	59.02	82.79	60.85
BGI_novel_G011054	bHLH	HLH	-	0	0.33	3.7	1.78	1.05	0.98
JL013405	bHLH	HLH	-	0.08	2.95	1.65	0.08	8.94	12.35
JL007387	bHLH	HLH	-	70.59	29.01	1.58	0.21	1.82	8.25
JL016757	bHLH	HLH	-	1.03	0.23	1.33	0.1	6.61	0.9
JL016411	bHLH	HLH	-	1.3	3.65	0.38	6.37	0.21	8.09
JL009214	bHLH	HLH	-	1.87	12.13	4.33	2.91	16.4	7.84
JL011705	bHLH	HLH	-	0.07	0	3.43	0.24	1.12	5.34
JL024469	bHLH	HLH	-	0.59	0.47	0.65	0.44	5.4	4.4
JL017217	bHLH	HLH	-	17.59	9.05	21.62	24.32	15.26	14.57
JL013245	bHLH	HLH	-	0	0.36	0.12	0	6.63	4.46
JL017164	bHLH	HLH	-	20	25.36	7.84	17.28	3.81	12.72
BGI_novel_G011056	bHLH	HLH	-	2.41	0.29	0	3.55	0.25	0
JL021384	bHLH	HLH	-	0.88	3.86	0.39	1.4	11.99	5.17
JL000985	bHLH	HLH	-	2.73	5.39	10.63	4.06	4.86	11.11
JL015498	bHLH	HLH	-	24.22	26.86	12.46	60.39	9.25	48.5
JL014192	bHLH	HLH	-	4.56	0	18.26	2.64	0.61	1.33
BGI_novel_G002004	bHLH	HLH	-	0	0.33	0	0	0.25	13.39
JL014940	bHLH	HLH	-	0.44	1.15	0.15	0.16	0.85	4.03
JL011080	bHLH	HLH	-	50.5	44.43	42	53.83	35.97	49.61
JL009493	bHLH	HLH	-	39.14	18.54	76.57	90.57	39.6	39.67
JL018474	bHLH	HLH	-	0	0.08	0	0.99	0	2.34
JL015354	bHLH	HLH	-	2.18	1.64	4.93	5.61	8.83	14.34
JL001559	bHLH	HLH	-	19	59.99	43.85	18.41	190.23	85.97
JL009647	bHLH	HLH	-	30.71	31.82	12.56	2.48	13.2	7.5
BGI_novel_G000388	bHLH	HLH	-	13.67	15.47	21.84	14.32	11.46	1.64
JL001273	bHLH	HLH	-	7.36	5.26	63.71	28.54	28.7	29.37
JL026199	bHLH	HLH	-	0	0.41	0	0	5.9	7.86
JL008504	bHLH	HLH	-	1.01	2.11	0	0.76	3.15	2.88
JL001691	bHLH	HLH	-	82.68	75.17	103.18	80.07	102.75	88.13
JL004402	bHLH	HLH	-	0	20.26	0	0	0	3.33
JL021790	bHLH	HLH	-	18.24	15.32	47.61	25.32	37.35	23.05
JL003653	bHLH	HLH	-	40.7	20.57	11.87	38.09	3.36	30.13
JL012508	bHLH	HLH	-	4.69	0.52	53.47	24.05	8.23	6.44
JL017733	bHLH	HLH	-	8.71	7.46	13.39	17.7	8.01	11.29
JL007440	bHLH	HLH	-	5.25	56.63	17.56	25.12	8.14	22.96
JL020204	bHLH	HLH	-	66.11	46.7	61.66	77.52	40.64	54.44
BGI_novel_G011047	bHLH	HLH	-	5.55	9.75	7.84	11.18	12.14	7.4
BGI_novel_G011060	bHLH	HLH	-	21.89	16.08	9.25	26.98	7.96	12.44
JL011669	bHLH	HLH	-	139.37	61.51	51.36	41.12	22.46	23.91
JL020800	bHLH	HLH	-	21.68	10.46	24.74	28.34	10.91	10.31
JL018887	bHLH	HLH	-	7.42	7.02	3.51	9.59	25.36	11.68
JL017749	bHLH	HLH	-	13.36	22.55	17.86	15.57	11.3	16.64
BGI_novel_G010222	bHLH	HLH	-	10.74	14.23	1.74	0.41	3.59	8.11
JL007412	bHLH	HLH	-	59.14	21.86	10.8	20.83	4.32	16.37
JL006109	bHLH	HLH	-	5.46	72.65	1.12	0.88	74.76	76.65
JL017155	bHLH	HLH	-	0	13.23	0	0	0	0.2
JL005738	bHLH	HLH	-	80.99	60.98	17.77	6.46	7.25	16.13
JL007632	bHLH	HLH	-	1.61	0.35	1.36	0.35	8.78	1.47
JL009847	bHLH	HLH	-	264.53	169.21	438.01	886.74	195.64	348.24
JL020070	bHLH	HLH	-	1.22	13.47	1.84	0.46	9.3	4.54
JL008229	bHLH	HLH	-	0.13	46.44	0.29	4.7	0.45	2.34
BGI_novel_G000956	bHLH	HLH	-	0.08	1.61	0.53	0.88	3.8	0.56
BGI_novel_G011267	bHLH	HLH	-	0.96	1.6	3.91	0.09	0	0.1
JL011932	bHLH	HLH	-	0.39	4.99	0.9	1.25	5	6.78
JL010581	bHLH	HLH	-	0	0	0	0	16.99	5.53
BGI_novel_G011061	bHLH	HLH	-	1.21	2.63	0.53	2.45	0.94	1.19
BGI_novel_G011046	bHLH	HLH	-	1.42	4.89	0.22	3.77	3.23	3.14
BGI_novel_G006216	bHLH	HLH	-	0.98	0.77	0.56	3.02	1.26	0.82
JL012129	bHLH	HLH	-	3.96	6.36	1.74	0.06	8.52	14.59
JL003814	bHLH	HLH	-	3.24	74.52	28.67	10.35	43.55	46.35
JL016121	bHLH	HLH	-	0.93	4.71	0	0.11	0.83	6.01
JL000579	bHLH	HLH	-	0.19	1.25	0.41	0.37	0.19	2.11
BGI_novel_G011265	bHLH	HLH	-	2.47	2.71	6.44	1.45	6.23	12.19
JL007846	bHLH	HLH	-	0	0.05	0.06	0.51	20.64	0.1
JL003006	bHLH	HLH	-	2.15	12.48	15.57	3.69	45.91	19.64
JL017966	bHLH	HLH	-	12.46	40.44	19.64	17.58	6.95	9.43
BGI_novel_G008866	bHLH	HLH	-	15.84	2.56	0.55	1.27	1.65	20.54
JL003125	bHLH	HLH	-	4.4	14.83	7.72	4.71	4.13	7.74
JL027674	bHLH	HLH	-	0	8.15	0	0	0	0.68
JL006587	bHLH	HLH	-	2.69	1.31	0	0.57	1.23	1.06
JL001606	bHLH	HLH	-	2.96	4.44	3.07	5.91	3.97	4.74
BGI_novel_G008867	bHLH	HLH	-	15.84	2.56	0.55	1.27	1.65	20.54
JL008423	BSD	BSD	-	30.9	33.35	29.64	22.72	28.82	23.01
JL015821	BSD	BSD	-	50.5	39.73	54.78	49.06	50.97	47.95
JL019177	BSD	BSD	-	14.3	8.64	7.9	7.08	4.78	7.28
JL004041	BSD	BSD	-	26.62	37.76	25.44	20.83	33.74	35.51
JL012184	BSD	BSD	-	16.96	19.54	17.08	16.23	17.57	14.26
JL020249	BSD	BSD	-	26.17	18.92	17.3	27.07	33.79	19.38
JL021116	bZIP	bZIP_1,bZIP_2,bZIP_Maf	HLH	0.05	6.49	1.19	1.68	2.64	5.28
JL000104	bZIP	bZIP_1,bZIP_2,bZIP_Maf	HLH	41.53	28.13	34.37	40.64	22.92	25.76
JL019092	bZIP	bZIP_1,bZIP_2,bZIP_Maf	HLH	100.16	108.31	35.85	26.2	23.15	35.25
JL002997	bZIP	bZIP_1,bZIP_2,bZIP_Maf	HLH	14.2	17.46	13.13	8.55	15.21	10.49
JL021767	bZIP	bZIP_1,bZIP_2,bZIP_Maf	HLH	0	16.22	0.13	0	26.39	5.33
JL000390	bZIP	bZIP_1,bZIP_2,bZIP_Maf	HLH	45.76	24.67	39.62	76.69	10.04	15.19
JL005280	bZIP	bZIP_1,bZIP_2,bZIP_Maf	HLH	29.58	27.53	19.61	28.18	33.9	20.57
JL001763	bZIP	bZIP_1,bZIP_2,bZIP_Maf	HLH	12.89	12.26	11.76	11.73	8.5	8.44
JL005343	bZIP	bZIP_1,bZIP_2,bZIP_Maf	HLH	15.87	25.56	33.86	24.5	16.13	33.87
JL005691	bZIP	bZIP_1,bZIP_2,bZIP_Maf	HLH	17.87	0.24	6.74	1	2.08	5.34
JL008310	bZIP	bZIP_1,bZIP_2,bZIP_Maf	HLH	40.95	30.74	33.35	37.1	39.01	34.91
JL023303	bZIP	bZIP_1,bZIP_2,bZIP_Maf	HLH	0	0.99	0.22	2.68	0	0.1
JL016369	bZIP	bZIP_1,bZIP_2,bZIP_Maf	HLH	71.69	75.02	57.27	52.11	52.67	50.18
JL014293	bZIP	bZIP_1,bZIP_2,bZIP_Maf	HLH	0.06	0.91	0	0	2.26	2.85
JL003165	bZIP	bZIP_1,bZIP_2,bZIP_Maf	HLH	32.67	63.32	21.57	28.05	70.04	25.7
JL023986	bZIP	bZIP_1,bZIP_2,bZIP_Maf	HLH	14.98	19.66	28.03	16.98	35.45	23.45
JL000838	bZIP	bZIP_1,bZIP_2,bZIP_Maf	HLH	18.71	19	18.41	16.86	35.01	26.12
JL014276	C2C2-CO-like	CCT,zf-B_box	GATA,PLATZ	58.94	55.57	96.34	211.21	110.23	126.56
JL011026	C2C2-CO-like	CCT,zf-B_box	GATA,PLATZ	13.92	15.35	14.84	16.45	32.37	14.8
JL017914	C2C2-CO-like	CCT,zf-B_box	GATA,PLATZ	10.65	15.75	4.3	25.03	11.14	39.89
JL006501	C2C2-CO-like	CCT,zf-B_box	GATA,PLATZ	6.87	14.25	7.27	11.64	21.48	20.72
JL010393	C2C2-CO-like	CCT,zf-B_box	GATA,PLATZ	58.42	33.38	57.06	41.81	30.46	19.57
JL021423	C2C2-CO-like	CCT,zf-B_box	GATA,PLATZ	0.88	5.61	1.19	3.57	14.47	10.42
JL001439	C2C2-CO-like	CCT,zf-B_box	GATA,PLATZ	4.64	4.11	2.2	9	42.38	19.28
JL004915	C2C2-CO-like	CCT,zf-B_box	GATA,PLATZ	53.46	41.21	96.93	268.76	80.8	95.82
JL009594	C2C2-CO-like	CCT,zf-B_box	GATA,PLATZ	34.23	5.93	37.62	190.8	1.4	39.61
JL007826	C2C2-Dof	zf-Dof	-	9.16	3.36	22.45	34.68	30.34	22.14
JL006146	C2C2-Dof	zf-Dof	-	0	0	0.1	0	6.75	0
BGI_novel_G009341	C2C2-Dof	zf-Dof	-	11.64	4.96	9.07	10.25	5.95	10.89
JL003594	C2C2-Dof	zf-Dof	-	0.73	1.74	1.8	3.78	1.69	1.39
JL016391	C2C2-Dof	zf-Dof	-	367.26	39.83	95.98	80.65	27.8	73.22
JL005025	C2C2-Dof	zf-Dof	-	28.27	24.52	17.6	22.01	49.84	56.47
JL002542	C2C2-Dof	zf-Dof	-	2.64	2	0.93	0.64	0.04	0.04
BGI_novel_G007056	C2C2-Dof	zf-Dof	-	28.35	0	0	14.39	1.07	5.82
JL024915	C2C2-Dof	zf-Dof	-	0	0.85	0.17	0.21	5.42	7.61
JL006491	C2C2-Dof	zf-Dof	-	4.89	36.42	8.26	2.43	0.24	0.95
JL003320	C2C2-Dof	zf-Dof	-	3.5	3.15	4.81	5.62	2.63	3.2
JL002645	C2C2-Dof	zf-Dof	-	40.07	19.4	34.83	41.48	30.11	33.78
JL007600	C2C2-Dof	zf-Dof	-	11.67	5.53	4.52	7.15	5.06	5.56
BGI_novel_G007057	C2C2-Dof	zf-Dof	-	2	0.01	0.07	0.67	0.67	0.25
JL014043	C2C2-Dof	zf-Dof	-	0.18	0.57	0.56	1.54	7.33	2.39
JL004040	C2C2-Dof	zf-Dof	-	46.28	6.76	67.26	53.54	16.39	19.73
JL002073	C2C2-Dof	zf-Dof	-	0.43	0	9.21	3.73	7.78	14.85
JL021820	C2C2-Dof	zf-Dof	-	23.66	7.93	8.02	14.62	10.58	12.81
JL015552	C2C2-Dof	zf-Dof	-	0.62	1.07	2.6	0.67	3.11	2.46
JL008679	C2C2-Dof	zf-Dof	-	179.6	39.3	33	44.1	21.06	41.3
BGI_novel_G003365	C2C2-Dof	zf-Dof	-	2.7	2.08	2.67	1.77	0.77	3.2
JL015551	C2C2-Dof	zf-Dof	-	0.62	1.07	2.6	0.67	3.11	2.46
JL009415	C2C2-Dof	zf-Dof	-	1.09	1.65	1.53	0.2	0.18	0
JL003595	C2C2-Dof	zf-Dof	-	10.12	12.17	17.22	34.77	42.29	48.02
JL019874	C2C2-Dof	zf-Dof	-	0	0	0	0	1.18	3.58
BGI_novel_G007765	C2C2-Dof	zf-Dof	-	16.85	2.05	0.76	2.36	0.48	3.03
JL005288	C2C2-Dof	zf-Dof	-	0	0.11	69.62	0.21	109.74	9.48
JL014461	C2C2-Dof	zf-Dof	-	7.3	13.69	1.68	2.69	9.59	25.18
JL003093	C2C2-Dof	zf-Dof	-	0.01	1.61	19.94	0.11	86.1	1.32
JL020779	C2C2-Dof	zf-Dof	-	21.8	9.48	23.84	42.2	72.4	23.55
JL017773	C2C2-Dof	zf-Dof	-	8.98	3.05	11.5	13.1	6.77	12.42
JL017003	C2C2-Dof	zf-Dof	-	7.46	1.97	2.73	5.36	2.24	4.9
BGI_novel_G007060	C2C2-Dof	zf-Dof	-	0	0	0.86	11.14	2.06	8.06
JL018406	C2C2-GATA	GATA	-	2.29	11.53	4.4	1.64	72.98	68.54
BGI_novel_G004398	C2C2-GATA	GATA	-	0	0	0	12.06	6.04	2.02
JL004448	C2C2-GATA	GATA	-	1.48	2.84	42.13	5.09	56	57.84
JL009936	C2C2-GATA	GATA	-	153.1	34.2	39.81	13.8	36.51	47.05
JL018384	C2C2-GATA	GATA	-	4.15	2.48	4.78	5.1	5.51	11.18
JL000358	C2C2-GATA	GATA	-	21.04	16.85	17.46	12.25	14.91	16.24
JL016711	C2C2-GATA	GATA	-	10.32	0.07	1.39	73.07	3.65	22.48
JL008065	C2C2-GATA	GATA	-	0.08	2.66	1.93	0.44	4.98	1.3
BGI_novel_G004584	C2C2-GATA	GATA	-	2.68	0.62	0	1.92	0	0
JL010493	C2C2-GATA	GATA	-	2.99	0.61	5.31	1.86	6.15	16.64
JL006448	C2C2-GATA	GATA	-	0.55	0	13.01	3.89	1.61	0.62
BGI_novel_G004585	C2C2-GATA	GATA	-	1.25	0	3.77	6.2	2.73	5.12
BGI_novel_G000205	C2C2-GATA	GATA	-	80.68	24.85	58.22	75.75	44.28	61
JL007311	C2C2-GATA	GATA	-	30.12	43.18	30.71	38.43	41.93	43.59
JL006365	C2C2-GATA	GATA	-	2.27	5.67	4.06	11.1	6.91	11.03
JL000037	C2C2-GATA	GATA	-	0.05	9.95	0.16	0	31.8	3.07
BGI_novel_G004397	C2C2-GATA	GATA	-	0	0	5.62	0	5.07	0
BGI_novel_G004582	C2C2-GATA	GATA	-	2.84	1.07	1	0.88	0	0
JL007288	C2C2-GATA	GATA	-	185.5	138.86	70.75	85.99	65.24	73.52
BGI_novel_G004400	C2C2-GATA	GATA	-	0.53	0	6.08	14.93	4.21	2.1
JL011583	C2C2-GATA	GATA	-	23.16	30.57	19	20.73	35.17	26.96
JL021202	C2C2-GATA	GATA	-	16.26	29.56	22.66	32.5	69.02	30.38
JL012525	C2C2-GATA	GATA	-	0.27	58.09	3.26	0.24	92.2	25.93
JL015062	C2C2-YABBY	YABBY	-	7	0.98	33.7	1.26	22.9	72.27
BGI_novel_G003582	C2C2-YABBY	YABBY	-	0	0	0	0	32.09	0
JL015519	C2C2-YABBY	YABBY	-	0	0	0.46	0.32	14.95	37.79
BGI_novel_G003585	C2C2-YABBY	YABBY	-	0	0	0.07	0	8.65	0
JL002701	C2C2-YABBY	YABBY	-	0.25	0	3.72	0.11	7.52	12.55
JL014607	C2C2-YABBY	YABBY	-	2.5	0	44.73	5.8	39.39	3.16
JL022893	C2C2-YABBY	YABBY	-	38.1	0.45	104.11	17.19	61.44	23.73
JL012772	C2C2-YABBY	YABBY	-	0	0	0.52	0.27	5.31	0
JL012272	C2C2-YABBY	YABBY	-	3.88	0	5.65	12.64	23.55	9.11
BGI_novel_G008463	C2H2	zf-C2H2	PHD	4.18	0.64	1.36	2.43	0.41	3.92
BGI_novel_G007434	C2H2	zf-C2H2	PHD	35.31	2.36	3.18	8.34	0.21	0.63
JL016423	C2H2	zf-C2H2	PHD	58.05	21.64	79.56	130.69	46.78	66.08
JL006977	C2H2	zf-C2H2	PHD	0.88	2.18	1.42	1.59	1.33	1.32
JL013103	C2H2	zf-C2H2	PHD	3.01	0.79	0.14	0	1.42	0.62
JL017508	C2H2	zf-C2H2	PHD	1.64	3.35	2.01	1.6	1.72	2.07
JL023066	C2H2	zf-C2H2	PHD	44.84	24.86	30.68	32.59	14.89	16.16
JL006454	C2H2	zf-C2H2	PHD	0.83	14.01	0	1.03	0.06	3.76
JL019930	C2H2	zf-C2H2	PHD	1.72	5.4	0.22	0	0.1	0.21
JL011552	C2H2	zf-C2H2	PHD	2.11	0.51	0.93	3.28	13.46	18.66
JL020910	C2H2	zf-C2H2	PHD	31.83	10.91	5.8	5.67	0.98	1.75
JL015468	C2H2	zf-C2H2	PHD	0.16	0	0	0	2.83	2.04
JL017507	C2H2	zf-C2H2	PHD	3.09	4.35	8.8	6.87	8.2	5.6
JL003305	C2H2	zf-C2H2	PHD	31.34	7.52	37.43	24.04	1.08	7.59
JL025090	C2H2	zf-C2H2	PHD	0	0	0	0.51	0.35	3.6
BGI_novel_G008464	C2H2	zf-C2H2	PHD	2.47	0.09	2.91	4.67	0.08	5.91
JL017908	C2H2	zf-C2H2	PHD	43.82	42.36	34.85	22.72	38.73	35.54
JL000573	C2H2	zf-C2H2	PHD	12.41	39.51	2.76	7.69	2.25	5.41
JL014944	C2H2	zf-C2H2	PHD	81.7	9.95	14.22	15.2	6.16	29.74
JL011495	C2H2	zf-C2H2	PHD	0.09	2.25	2.11	0.46	12.51	1.08
JL020888	C2H2	zf-C2H2	PHD	0.42	0.85	1.16	0.24	1.92	0.46
JL012352	C2H2	zf-C2H2	PHD	3.34	7.36	6.28	6.02	6.14	5.39
JL018842	C2H2	zf-C2H2	PHD	116.27	4.11	7.71	8.88	1.51	1.27
JL015859	C2H2	zf-C2H2	PHD	0.12	0.29	2.22	0.08	1.48	0.15
JL003408	C2H2	zf-C2H2	PHD	0.62	0.05	0	0.26	1.29	0.04
JL006123	C2H2	zf-C2H2	PHD	0.29	0.43	18.48	42.24	0.42	1.53
JL006650	C2H2	zf-C2H2	PHD	502.63	199.7	160.94	135.56	23.8	123.98
JL003508	C2H2	zf-C2H2	PHD	3.46	1.01	1.55	1.92	11.15	3.13
JL020658	C2H2	zf-C2H2	PHD	24.74	3.5	1.43	0	0	0
JL014359	C2H2	zf-C2H2	PHD	43.39	47.99	110.05	21.23	8.94	25.89
JL019571	C2H2	zf-C2H2	PHD	1.43	0.42	32.74	2.61	3.62	1.74
JL018432	C2H2	zf-C2H2	PHD	12.02	41.9	2.69	14.88	2.89	8.86
JL010953	C2H2	zf-C2H2	PHD	54.43	29.51	21.96	67.81	82.05	60.15
JL014945	C2H2	zf-C2H2	PHD	0	0	0	0	4.55	0
JL012967	C2H2	zf-C2H2	PHD	9.1	9.05	56.35	63.5	51.97	48.34
JL019265	C2H2	zf-C2H2	PHD	1.41	1.51	0	0.86	0.16	0
JL002007	C2H2	zf-C2H2	PHD	0.22	0.14	4.96	2.26	10.54	14.17
JL018837	C2H2	zf-C2H2	PHD	19.17	0.23	0.78	1.89	0.2	2.37
JL020938	C2H2	zf-C2H2	PHD	2.67	4.59	0.19	1.79	0	1.11
BGI_novel_G003163	C2H2	zf-C2H2	PHD	0.08	4.82	0.04	0.18	0.3	1.64
JL020657	C2H2	zf-C2H2	PHD	24.74	3.5	1.43	0	0	0
BGI_novel_G004869	C2H2	zf-C2H2	PHD	2.65	2.51	3.48	0	0.88	0.92
JL012242	C2H2	zf-C2H2	PHD	69.21	91.45	32.24	15.53	17.75	35.28
JL006427	C2H2	zf-C2H2	PHD	26.23	24.47	26.17	28.05	31.12	26.59
BGI_novel_G007779	C2H2	zf-C2H2	PHD	0.06	0.06	0.13	1.69	0.86	15.35
JL020656	C2H2	zf-C2H2	PHD	3.8	3.26	0.99	21.04	0.93	2.97
JL000741	C2H2	zf-C2H2	PHD	124.93	36.26	73.98	100.02	43.28	46.44
JL019692	C2H2	zf-C2H2	PHD	0.16	0	1.86	0.47	4.62	1.4
JL014942	C2H2	zf-C2H2	PHD	289.17	154.5	84.63	95.34	13.69	63.56
JL010053	C2H2	zf-C2H2	PHD	39.87	55.96	34.48	53.89	36.02	52.43
JL022716	C2H2	zf-C2H2	PHD	4.22	12.96	5.53	5.85	10.11	9.4
JL014943	C2H2	zf-C2H2	PHD	341.7	180.94	86.33	60.72	14.01	69.41
BGI_novel_G008465	C2H2	zf-C2H2	PHD	1.83	3.34	0	0.61	0.19	0.19
JL025743	C2H2	zf-C2H2	PHD	53.85	5.43	11.76	11.33	3.04	11.41
JL015295	C2H2	zf-C2H2	PHD	13.38	20.21	9.25	18.29	33.54	31.22
JL006392	C2H2	zf-C2H2	PHD	3.01	1.48	0.23	1.1	4.34	0.95
JL010723	C3H	zf-CCCH	PHD,SNF2_N,zf-C2H2	30.07	23.67	16.29	31.55	21.56	17.5
BGI_novel_G006264	C3H	zf-CCCH	PHD,SNF2_N,zf-C2H2	0	0	1.72	2.85	0.26	0
JL004300	C3H	zf-CCCH	PHD,SNF2_N,zf-C2H2	14.72	21.73	22.21	25.41	22.25	21.34
BGI_novel_G001285	C3H	zf-CCCH	PHD,SNF2_N,zf-C2H2	0.28	0.31	0.18	0.24	0.5	0.29
JL013651	C3H	zf-CCCH	PHD,SNF2_N,zf-C2H2	22.07	25.84	28.54	20.09	24.76	13.52
JL006043	C3H	zf-CCCH	PHD,SNF2_N,zf-C2H2	12.35	11.47	9.49	7.26	23.61	15.03
JL009004	C3H	zf-CCCH	PHD,SNF2_N,zf-C2H2	14.17	21.55	20.95	23.1	27.74	24.44
JL019331	C3H	zf-CCCH	PHD,SNF2_N,zf-C2H2	16.37	22.71	10.71	15.33	22.66	16.71
JL005606	C3H	zf-CCCH	PHD,SNF2_N,zf-C2H2	72.71	92.14	98.72	97.87	130.09	115.93
JL024986	C3H	zf-CCCH	PHD,SNF2_N,zf-C2H2	18.35	25.47	19.26	20.56	17.79	22.62
JL002392	C3H	zf-CCCH	PHD,SNF2_N,zf-C2H2	79.54	77.67	74.01	65.8	69.87	71.74
JL011428	C3H	zf-CCCH	PHD,SNF2_N,zf-C2H2	14.97	14.32	21.96	17.84	15.93	18.23
JL011312	C3H	zf-CCCH	PHD,SNF2_N,zf-C2H2	28.83	31.97	25.49	32.71	27.16	23.42
BGI_novel_G006269	C3H	zf-CCCH	PHD,SNF2_N,zf-C2H2	0.18	0.73	7.5	7.66	2.57	2.3
JL001086	C3H	zf-CCCH	PHD,SNF2_N,zf-C2H2	0	0.25	0.62	0.26	2.77	0.59
JL018370	C3H	zf-CCCH	PHD,SNF2_N,zf-C2H2	20.68	29.83	25.34	23.39	16.68	15.1
JL006044	C3H	zf-CCCH	PHD,SNF2_N,zf-C2H2	3.95	5.39	5.17	4.2	20.3	5.4
JL020192	C3H	zf-CCCH	PHD,SNF2_N,zf-C2H2	24.27	16.04	22.2	26.03	7.33	15.85
JL001597	C3H	zf-CCCH	PHD,SNF2_N,zf-C2H2	17.3	16.2	20.29	22.12	20.38	24.92
JL000949	C3H	zf-CCCH	PHD,SNF2_N,zf-C2H2	20.36	11.07	13.86	10.37	30.7	25.34
BGI_novel_G001286	C3H	zf-CCCH	PHD,SNF2_N,zf-C2H2	12.45	13.06	18.99	15.1	15.61	18.06
JL008961	C3H	zf-CCCH	PHD,SNF2_N,zf-C2H2	85.03	57.26	104.3	166.46	75.86	92.02
BGI_novel_G010829	C3H	zf-CCCH	PHD,SNF2_N,zf-C2H2	0.37	0.79	5.71	0.48	0.31	1.26
BGI_novel_G006262	C3H	zf-CCCH	PHD,SNF2_N,zf-C2H2	15.42	12.91	9.71	17.73	4.51	5.54
JL004089	C3H	zf-CCCH	PHD,SNF2_N,zf-C2H2	14.83	13.29	17.46	17.74	22.04	17.33
JL018013	C3H	zf-CCCH	PHD,SNF2_N,zf-C2H2	3.43	18.17	0.08	9.69	1.09	15.36
JL016148	C3H	zf-CCCH	PHD,SNF2_N,zf-C2H2	51.89	53.61	69.32	65.54	90.71	78.88
JL009659	C3H	zf-CCCH	PHD,SNF2_N,zf-C2H2	8.94	20.73	15.41	12.02	17.34	15
JL015068	C3H	zf-CCCH	PHD,SNF2_N,zf-C2H2	110.5	199.18	84.68	116.23	125.02	140.26
BGI_novel_G006268	C3H	zf-CCCH	PHD,SNF2_N,zf-C2H2	10.47	9.74	16.82	6.87	13.36	9.96
JL004211	C3H	zf-CCCH	PHD,SNF2_N,zf-C2H2	44.3	36.51	22.57	19.9	20.76	14.63
JL008692	C3H	zf-CCCH	PHD,SNF2_N,zf-C2H2	10.64	8.15	11.7	11.96	18.04	11.82
JL016607	C3H	zf-CCCH	PHD,SNF2_N,zf-C2H2	35.41	53.72	51.9	53.89	31.25	41.82
JL017120	C3H	zf-CCCH	PHD,SNF2_N,zf-C2H2	7.92	15.94	21.44	29.95	15.2	16.95
JL000221	C3H	zf-CCCH	PHD,SNF2_N,zf-C2H2	19.93	16.31	17.21	18.41	16.96	24.97
JL003474	C3H	zf-CCCH	PHD,SNF2_N,zf-C2H2	30.74	30.52	15.78	9.49	28.51	15.89
JL005860	C3H	zf-CCCH	PHD,SNF2_N,zf-C2H2	16.14	20.29	22.39	17.52	19.62	19.16
JL020080	C3H	zf-CCCH	PHD,SNF2_N,zf-C2H2	21.8	13.32	29.3	37.82	22.88	17.34
JL016000	C3H	zf-CCCH	PHD,SNF2_N,zf-C2H2	60.88	124.62	93.19	76.43	135.68	103.51
JL006619	C3H	zf-CCCH	PHD,SNF2_N,zf-C2H2	20.25	57.57	32.41	45.01	31.53	65.93
JL023313	C3H	zf-CCCH	PHD,SNF2_N,zf-C2H2	7.64	5.94	9.52	8.84	7.92	5.51
JL004675	C3H	zf-CCCH	PHD,SNF2_N,zf-C2H2	31.95	21.36	19.72	29.92	26.49	26.12
JL023864	C3H	zf-CCCH	PHD,SNF2_N,zf-C2H2	29.06	30.1	30.54	42	49.16	45.58
JL022856	C3H	zf-CCCH	PHD,SNF2_N,zf-C2H2	0.11	1.59	0.39	0.1	6.95	3
BGI_novel_G000984	C3H	zf-CCCH	PHD,SNF2_N,zf-C2H2	0.07	4.54	1.53	0.22	27.25	32.29
JL006917	C3H	zf-CCCH	PHD,SNF2_N,zf-C2H2	9.87	2.39	5.34	18.25	8.62	8.05
BGI_novel_G006265	C3H	zf-CCCH	PHD,SNF2_N,zf-C2H2	0	0	2.22	1.39	1.41	0
JL008354	C3H	zf-CCCH	PHD,SNF2_N,zf-C2H2	24.24	22.91	25.78	27.51	24.71	20.88
BGI_novel_G005650	C3H	zf-CCCH	PHD,SNF2_N,zf-C2H2	4.25	5.73	3.59	0	0	2.33
JL018958	C3H	zf-CCCH	PHD,SNF2_N,zf-C2H2	265.33	277.1	287.42	695.15	290.48	358.13
JL019843	C3H	zf-CCCH	PHD,SNF2_N,zf-C2H2	618.18	179.68	184.74	175.71	47.23	159.17
JL002894	C3H	zf-CCCH	PHD,SNF2_N,zf-C2H2	31.09	35.97	26.45	30.27	42.6	26.17
JL003608	C3H	zf-CCCH	PHD,SNF2_N,zf-C2H2	39.55	71.02	63.67	51.76	70.02	75.76
BGI_novel_G006270	C3H	zf-CCCH	PHD,SNF2_N,zf-C2H2	4.53	3.52	17.29	14.76	8.38	8.95
JL023253	C3H	zf-CCCH	PHD,SNF2_N,zf-C2H2	735.46	244.8	245.59	389.05	46.99	152.23
JL025355	C3H	zf-CCCH	PHD,SNF2_N,zf-C2H2	0	0.61	0.12	0.12	8.45	9.97
JL005562	CAMTA	CG-1,IQ	-	22.61	33.24	28.88	20.7	30.97	19.07
JL029917	CPP	TCR	-	10.73	24.04	0	13.98	0	1.34
JL014012	CPP	TCR	-	5.12	44.04	10.43	7.14	40.39	40.81
BGI_novel_G000358	CPP	TCR	-	1.51	0.84	0.65	0.87	1.83	2.4
BGI_novel_G000359	CPP	TCR	-	3.16	5.48	3.13	3.68	5.44	4.38
BGI_novel_G010454	CPP	TCR	-	2.33	2.11	2.55	2.15	4.97	2.23
JL007034	CPP	TCR	-	7.28	12.94	3.44	6.63	2.26	3.19
JL002164	CPP	TCR	-	0.13	2.39	0.04	0.32	0.92	9.36
JL023390	CSD	CSD	-	20.69	53.35	18.88	24.36	32.49	26.36
JL002984	CSD	CSD	-	20.22	22.11	18.78	23.33	26.89	16.06
BGI_novel_G003327	CSD	CSD	-	9.92	5.58	4.57	1.9	2.2	4.06
JL014851	CSD	CSD	-	100.54	181.52	110.09	180.44	79.73	83.42
JL011903	E2F-DP	E2F_TDP	-	0.07	0.43	0.35	1.01	0.11	1.34
JL004532	E2F-DP	E2F_TDP	-	1.83	5.8	3.97	4.87	6.48	13
JL018670	E2F-DP	E2F_TDP	-	9.82	13.67	8.56	10.83	7.27	7.39
JL022318	E2F-DP	E2F_TDP	-	4.42	12.34	4.49	2.22	12.08	14.7
JL022014	E2F-DP	E2F_TDP	-	22.14	201.7	38.81	8.46	194.9	196.9
JL012197	E2F-DP	E2F_TDP	-	67.1	61.41	30.83	60.96	25.82	30.93
JL003254	E2F-DP	E2F_TDP	-	1	2.93	1.8	1.23	3.84	3.94
JL023728	EIL	EIN3	-	78.13	36.11	74.45	76.05	64.06	53.57
JL016224	EIL	EIN3	-	19.11	16.3	15.8	13.66	5.71	6.87
JL012088	EIL	EIN3	-	30.16	17.76	29.8	44.38	49.63	29.23
JL020636	EIL	EIN3	-	17.19	14.66	14.8	12.81	13.18	10.07
JL012087	EIL	EIN3	-	177.36	115.32	105.74	158.52	147.16	95.91
JL006610	FAR1	FAR1	-	14.28	22.44	25	21.56	27.7	21.46
JL026033	FAR1	FAR1	-	0.89	6.4	2.09	1.55	0.72	1.7
JL005029	FAR1	FAR1	-	0.08	0.58	0.74	0.14	0.16	0.34
JL012844	FAR1	FAR1	-	0.21	1.16	0.58	0.54	0.62	0.71
JL001680	FAR1	FAR1	-	3.21	4.09	3.49	4.83	4.31	4.38
JL008934	FAR1	FAR1	-	9.52	11.05	12.47	15.72	6.55	9.75
JL017033	FAR1	FAR1	-	5.18	10.23	6.84	5.1	7.32	5.27
JL025197	FAR1	FAR1	-	0.3	0.33	1.38	2.57	1.47	0.69
BGI_novel_G005960	FAR1	FAR1	-	3.12	1.75	5.98	6.69	6.64	7.82
JL005254	FAR1	FAR1	-	0.33	0.5	1.98	1.47	0.16	0.16
JL008709	FAR1	FAR1	-	5.07	4.89	7.21	6.78	3.95	3.18
JL001726	FAR1	FAR1	-	11.97	9.38	20.78	23.13	16.78	15.56
JL021560	FAR1	FAR1	-	2.33	3.17	3.37	5.48	4.32	4.65
JL022614	FAR1	FAR1	-	0.19	0.74	0.83	1.37	0.89	1.2
JL005803	FAR1	FAR1	-	2.26	3.32	4.32	3.02	1.59	4.92
JL012029	FAR1	FAR1	-	6.62	10.73	12.05	12.39	12.56	15.18
JL026201	FAR1	FAR1	-	0.42	0.95	2.61	0.68	0.38	1.24
JL003753	FAR1	FAR1	-	5.62	9.5	7.63	7.86	9.74	9.81
JL024252	FAR1	FAR1	-	4.09	7.31	18.76	13.76	1.18	1.59
JL000911	FAR1	FAR1	-	5.01	4.84	7.94	7.39	4.42	5.83
JL018788	FAR1	FAR1	-	7.06	6.77	9.34	8.71	9.64	9.95
JL002835	FAR1	FAR1	-	5.08	7.26	7.67	6.29	8.5	14.8
BGI_novel_G002181	FAR1	FAR1	-	1.23	0.75	6.38	5.75	5.58	3.74
JL010667	FAR1	FAR1	-	11.73	8.95	22.47	22.95	19.9	28.8
JL008018	FAR1	FAR1	-	8.83	12.54	16.16	17.19	11.29	12.65
JL017174	FAR1	FAR1	-	13.46	21.23	16.55	16.29	7.86	25.74
JL003702	FAR1	FAR1	-	5.88	6.02	6.44	6.19	8.71	6.85
BGI_novel_G008470	FAR1	FAR1	-	10.48	14.18	31.33	36.43	0	0
JL018382	FAR1	FAR1	-	6.03	9.66	7.19	8.64	5.42	5.43
JL022483	FAR1	FAR1	-	22.24	17.07	14.97	17.77	13.23	18.26
BGI_novel_G005959	FAR1	FAR1	-	3.12	1.75	5.98	6.69	6.64	7.82
BGI_novel_G005833	FAR1	FAR1	-	13.34	21.38	30.62	34.32	15.55	19
JL002633	FAR1	FAR1	-	12.89	15.92	22.8	19.43	19.98	17.08
JL027092	FAR1	FAR1	-	1943.24	1620.38	273.45	698.35	419.03	2172.04
JL025199	FAR1	FAR1	-	4.04	5.71	7.43	4.86	4.72	4.32
JL017935	FAR1	FAR1	-	8.53	9.95	10.9	11.03	11.17	10.15
JL018242	FAR1	FAR1	-	4.59	5.09	5.41	6.03	1.84	3.47
JL010901	FAR1	FAR1	-	6.05	7.16	9.89	7.05	16.61	10.21
JL013699	FAR1	FAR1	-	15.32	19.69	16.34	12.56	18.4	10.79
JL024933	FAR1	FAR1	-	0.29	0.68	2.79	1	1.2	1.75
JL013700	FAR1	FAR1	-	0.41	1.14	4.75	3.13	2.3	3.81
JL019397	FHA	FHA	-	4.81	2.56	3.61	10.65	12.45	5.13
BGI_novel_G007221	FHA	FHA	-	2.95	2.09	10.02	7.42	8.13	8.61
JL014131	FHA	FHA	-	67.14	100.78	76.88	88.48	101.75	83.54
BGI_novel_G007220	FHA	FHA	-	2.95	2.09	10.02	7.42	8.13	8.61
JL007561	FHA	FHA	-	0.38	0.73	0.16	0.66	0.08	0.31
JL019398	FHA	FHA	-	0.41	0	0	0.82	2.48	1.01
BGI_novel_G002566	FHA	FHA	-	10.92	12.36	11.96	10.84	16.83	16.76
JL010542	FHA	FHA	-	23.11	29.79	20.68	14.69	24.38	20.86
BGI_novel_G002565	FHA	FHA	-	10.92	12.36	11.96	10.84	16.83	16.76
JL021915	FHA	FHA	-	0.28	4.58	1.16	0.89	1.34	4.99
JL018999	FHA	FHA	-	0.11	2.24	0.55	0.38	3.55	4.23
JL005491	FHA	FHA	-	39.21	25.01	24.17	27.15	16.9	20.12
JL002339	FHA	FHA	-	0.05	9.36	0.5	0.57	3.24	8.26
JL003810	FHA	FHA	-	24.54	19.41	20.67	27.28	21.98	24.18
BGI_novel_G007222	FHA	FHA	-	2.95	2.09	10.02	7.42	8.13	8.61
JL007271	FHA	FHA	-	57.2	22.51	65.74	108.16	33.11	37.1
JL024717	FHA	FHA	-	10.3	13.09	16.62	12.48	14.37	21.44
JL000249	FHA	FHA	-	35.91	39.49	58.48	50.71	40.4	55.41
JL014310	FHA	FHA	-	15.23	18.68	18.54	18.83	24.93	22.83
JL026871	G2-like	G2-like	Response_reg	0.01	0.48	0.11	0.44	1.04	1.98
JL009383	G2-like	G2-like	Response_reg	19.45	3.21	4.24	29.83	37.66	33.54
JL016275	G2-like	G2-like	Response_reg	12.26	28.69	14.37	36.8	11.99	44.47
JL002258	G2-like	G2-like	Response_reg	27.89	8.52	19.81	28.56	13.39	24.35
JL008607	G2-like	G2-like	Response_reg	6.97	0.56	9.39	7.09	1.13	2.87
JL013891	G2-like	G2-like	Response_reg	109.7	128	108.16	149.75	93.52	84.21
JL013037	G2-like	G2-like	Response_reg	13.7	26.12	18.83	19.63	25.5	28.5
JL010471	G2-like	G2-like	Response_reg	0.71	0.27	2.45	0.61	4.85	2.63
JL001397	G2-like	G2-like	Response_reg	1.96	1.29	1.89	2.95	0.41	2.32
JL001999	G2-like	G2-like	Response_reg	20.01	28.52	7.13	14.78	12.55	13.52
JL003704	G2-like	G2-like	Response_reg	3.66	3.41	3.02	9.47	2.94	6.65
JL012987	G2-like	G2-like	Response_reg	1.11	0.42	1.24	1	0.64	0.4
JL022659	G2-like	G2-like	Response_reg	3.89	28.88	0.07	6.96	0.04	5.81
JL023466	G2-like	G2-like	Response_reg	10.22	21.66	14.45	12.58	16.31	15.66
JL020211	G2-like	G2-like	Response_reg	5.38	7.9	4.26	4.61	5.1	5.14
JL013858	G2-like	G2-like	Response_reg	2.13	17.97	2.16	2.45	6.44	7.29
JL019368	G2-like	G2-like	Response_reg	4.78	8.75	15	7.48	7.34	5.61
JL019597	G2-like	G2-like	Response_reg	2.67	0.25	0.65	1.22	1.86	1.76
JL016586	G2-like	G2-like	Response_reg	50.85	32.8	37.19	25.8	29.32	23.53
JL023865	G2-like	G2-like	Response_reg	255.11	206.72	452.94	234.91	195.71	188.87
JL001998	G2-like	G2-like	Response_reg	68.58	58.29	78.94	104.99	48.89	70.27
JL014932	G2-like	G2-like	Response_reg	5.57	4.46	1.61	3.51	5.06	5.42
JL005216	G2-like	G2-like	Response_reg	15.34	38.25	18.17	6.9	31.23	15.51
JL011059	G2-like	G2-like	Response_reg	0.06	0.63	0	0.06	1.83	3.03
JL000795	G2-like	G2-like	Response_reg	0.4	0.48	0.46	1.2	1.68	1.25
JL008275	G2-like	G2-like	Response_reg	30.92	28.98	33.66	35.42	52.57	34.86
JL001765	G2-like	G2-like	Response_reg	17.26	17.98	23.26	18.52	17.36	18.97
JL009175	G2-like	G2-like	Response_reg	5.71	5.09	0.84	3.1	7.57	9.1
JL003588	G2-like	G2-like	Response_reg	10.5	3.39	2.91	2.83	3.19	3.1
JL005215	G2-like	G2-like	Response_reg	4.39	23.99	10.58	1.91	24.25	7.39
JL011041	G2-like	G2-like	Response_reg	7.15	0.11	0	33.72	0.07	4.28
JL028751	G2-like	G2-like	Response_reg	4.6	8.47	10	18.55	2.79	3.89
JL003047	G2-like	G2-like	Response_reg	4.35	38.43	0.41	4.14	0.13	5.87
BGI_novel_G003516	G2-like	G2-like	Response_reg	0.24	5.08	1.19	1.03	0	1.34
JL020841	G2-like	G2-like	Response_reg	62.3	50.91	49.9	50.75	46.19	36.69
BGI_novel_G002670	G2-like	G2-like	Response_reg	15.8	0.22	1.81	0.8	0.04	0.04
JL002713	G2-like	G2-like	Response_reg	10.43	25.94	16.67	13.89	17.11	14.48
JL018327	G2-like	G2-like	Response_reg	6.79	6.12	6.99	6.85	8.09	6.29
JL009947	G2-like	G2-like	Response_reg	7.61	7.78	10.47	4.85	13.89	11.22
JL027303	G2-like	G2-like	Response_reg	0.4	4.29	0.62	1.7	0.51	2.6
JL004900	G2-like	G2-like	Response_reg	13.34	12.57	13.09	16.08	13.21	11.5
JL004829	G2-like	G2-like	Response_reg	34.26	14.86	70.05	53.32	43.17	14.41
BGI_novel_G009665	G2-like	G2-like	Response_reg	2.98	1.86	1.84	5.03	8.69	13.86
JL014929	G2-like	G2-like	Response_reg	6.67	4.76	1.8	5.71	12.19	13.65
JL011473	G2-like	G2-like	Response_reg	58.95	16.76	16.98	13.11	7.88	7.52
JL019647	GeBP	DUF573	-	9.05	11.87	9.53	8.42	16.25	9.84
JL001709	GeBP	DUF573	-	5.72	9.06	5.9	7.01	8.43	6.67
JL015420	GeBP	DUF573	-	92.88	106.51	85.63	82.48	106.5	115.67
JL024538	GeBP	DUF573	-	3.15	4.08	1.81	1.3	2.14	7.49
JL004581	GeBP	DUF573	-	2.71	4.67	5.88	4.86	4.87	3.32
JL000417	GeBP	DUF573	-	38.71	42.84	42.03	28.16	49.48	41.68
JL001710	GeBP	DUF573	-	10.65	14.6	15.44	15.22	17.17	15.06
JL010290	GeBP	DUF573	-	38.37	30.4	37.01	57.19	40.9	53.76
JL013950	GRAS	GRAS	-	54.81	48.29	24.63	38.17	7.7	23.53
JL000880	GRAS	GRAS	-	8.34	6.66	0.91	1.65	0.44	1.48
JL020084	GRAS	GRAS	-	65.27	50.56	39.87	64.96	32.81	32.48
JL027736	GRAS	GRAS	-	0	0	0	1.5	1.63	0.64
JL001544	GRAS	GRAS	-	3.34	6.15	5.82	2.48	5.74	7.03
JL021926	GRAS	GRAS	-	23.63	16.51	18.4	13.63	22.68	17.87
JL006315	GRAS	GRAS	-	27.69	21.64	13.98	16.55	5.63	8.35
JL018223	GRAS	GRAS	-	53.67	31.74	33.62	27.67	10.07	22.18
JL019967	GRAS	GRAS	-	142.17	51.34	50.45	45.19	68.01	34.74
JL012041	GRAS	GRAS	-	55.74	26.48	42.64	40.41	22.93	30.37
JL005171	GRAS	GRAS	-	132.46	51.82	65.83	151.77	62.45	41.51
JL012449	GRAS	GRAS	-	4.57	17.53	10.08	10.82	4.19	8.09
JL021148	GRAS	GRAS	-	0.22	1.43	1.34	0.9	1.98	2.26
JL008521	GRAS	GRAS	-	98.61	32.33	31.47	38.5	7.6	14.47
JL006314	GRAS	GRAS	-	9.86	28.94	15.19	6.7	6.49	13.41
JL000755	GRAS	GRAS	-	6.85	2.08	3.79	2.64	5.31	5.33
JL006635	GRAS	GRAS	-	1.32	8.66	7.97	4.02	36.94	24.9
JL015204	GRAS	GRAS	-	0.31	5.07	0.03	1.15	0.17	1.42
JL002006	GRAS	GRAS	-	0.04	0.15	0.3	0.46	0.92	0.36
JL015722	GRAS	GRAS	-	7.38	7.88	9.43	25.67	10.32	11.65
JL010972	GRAS	GRAS	-	138.14	8.06	10.46	9.48	5.96	4.77
JL014188	GRAS	GRAS	-	0	4.66	0	0	0.48	2.53
JL026890	GRAS	GRAS	-	4.36	4.75	0.88	6.54	14.71	6.44
JL015711	GRAS	GRAS	-	8.25	12.98	1.74	12.2	6.19	13.76
JL018780	GRAS	GRAS	-	0.14	9.12	0.27	0.64	0.11	2.99
JL002972	GRAS	GRAS	-	1.76	6.27	5.11	2.2	2.54	2.12
JL020085	GRAS	GRAS	-	25.68	23.41	19.89	20.05	21.32	24.47
JL027866	GRAS	GRAS	-	0	2.91	0	0	0.9	1.35
JL014360	GRAS	GRAS	-	17.42	13.72	4.95	9.1	0.85	12.92
JL000014	GRAS	GRAS	-	33.79	94.88	15.79	16	11.82	36.63
JL004544	GRAS	GRAS	-	32.69	47.42	18.67	16.34	17.87	35.24
JL002321	GRAS	GRAS	-	14.1	25.71	8.3	8.73	12.01	15.04
JL012507	GRAS	GRAS	-	6.59	33.66	5.9	15.55	26.55	33.69
JL003364	GRAS	GRAS	-	30.53	32.65	13.61	16.18	19.21	14.27
JL004285	GRAS	GRAS	-	1.22	4.96	1.47	1.52	4.45	4.34
BGI_novel_G001407	GRAS	GRAS	-	1.48	3.43	3.25	0	0	0
JL015431	GRAS	GRAS	-	0	3.26	0.04	0.47	0.83	1.27
JL007802	GRAS	GRAS	-	59.5	63.1	50.18	113.39	43.5	65.05
JL011870	GRAS	GRAS	-	7.51	9.1	10.05	2.91	1.4	2.55
JL015274	GRAS	GRAS	-	2.18	4.31	5.07	6.64	4.83	7.69
JL007497	GRAS	GRAS	-	114.99	122.84	111.86	142.04	103.89	114.72
JL011268	GRAS	GRAS	-	0.73	14.34	1.25	0.55	1.01	4.31
JL002873	GRAS	GRAS	-	121.68	37.02	41.99	36.05	22.5	20.44
JL025407	GRF	QLQ,WRC	-	0.37	0.23	6.29	0.35	4.05	1.88
JL015709	GRF	QLQ,WRC	-	6.58	23.28	7.35	9.47	12.04	17.47
JL016185	GRF	QLQ,WRC	-	2.49	21.23	0.88	1.4	5.34	20.9
BGI_novel_G001626	GRF	QLQ,WRC	-	0.3	1.26	0.66	0.86	4.97	3.58
JL026352	GRF	QLQ,WRC	-	0.53	5.75	0	0.09	3.78	7.88
JL000052	GRF	QLQ,WRC	-	12.51	14.66	13.87	8.02	43.94	58.12
JL008124	GRF	QLQ,WRC	-	10.72	55.07	7.65	9.32	29.48	28.7
JL017263	GRF	QLQ,WRC	-	0	0.78	0.05	0.23	0.47	2.11
JL020445	GRF	QLQ,WRC	-	3.26	8.81	18.54	21.01	16.18	18.93
JL001318	GRF	QLQ,WRC	-	9.49	10.91	17.33	11.78	18.28	36.19
JL011364	HB	Homeobox,KNOX1,KNOX2	-	162.32	58.32	144.95	302.5	20.4	59.85
JL019162	HB	Homeobox,KNOX1,KNOX2	-	92.88	41.53	54.67	43.77	53.01	36.5
JL007711	HB	Homeobox,KNOX1,KNOX2	-	52.01	0.21	5.32	11.02	14.53	23.35
JL000938	HB	Homeobox,KNOX1,KNOX2	-	27.86	0.09	0.04	5.15	17.32	31.46
JL002286	HB	Homeobox,KNOX1,KNOX2	-	19.98	3.2	14.27	11.4	19.04	17.9
JL016877	HB	Homeobox,KNOX1,KNOX2	-	89.83	0.22	0.11	25.3	44.85	24.53
JL023170	HRT	HRT	-	70.24	40.77	34.51	58.4	9.9	19.09
JL023171	HRT	HRT	-	12.4	33.89	2.23	11.19	1.42	4.33
JL006224	HSF	HSF_DNA-bind	-	2.22	0	0.14	0.18	0.16	0.25
JL003140	HSF	HSF_DNA-bind	-	3.13	0.75	0.76	0.4	2.56	0.36
JL015732	HSF	HSF_DNA-bind	-	248.76	37.39	100.89	55.72	40.08	20.37
JL013067	HSF	HSF_DNA-bind	-	0.53	0.71	0.5	0.56	1.07	0.32
JL006225	HSF	HSF_DNA-bind	-	2.22	0	0.14	0.18	0.16	0.25
BGI_novel_G006309	HSF	HSF_DNA-bind	-	12.6	21.29	12.35	54.68	5.2	22.11
JL004848	HSF	HSF_DNA-bind	-	14.74	16.72	15.07	13.73	21.35	12.66
JL018205	HSF	HSF_DNA-bind	-	33.13	28.65	18.19	15.89	11.41	11.96
JL013464	HSF	HSF_DNA-bind	-	15.78	18.68	24.15	28.11	15.25	19.78
JL005577	HSF	HSF_DNA-bind	-	11.78	11.87	19.26	21.76	12.1	13.86
JL007445	HSF	HSF_DNA-bind	-	16.32	7.21	12.29	36.3	9.71	13.66
JL004962	HSF	HSF_DNA-bind	-	26.08	11.67	8.6	4.15	9.51	2.83
JL004383	HSF	HSF_DNA-bind	-	5.04	3.34	6.48	5.48	2.86	2.65
JL008753	HSF	HSF_DNA-bind	-	0	0.12	0.27	0.21	15.53	2.11
JL013812	HSF	HSF_DNA-bind	-	0.03	6.38	0	0.27	8.09	17.44
JL000571	HSF	HSF_DNA-bind	-	1.21	4.14	2.81	2.17	8.52	6.06
JL011700	HSF	HSF_DNA-bind	-	109.33	21.16	60.87	19.24	3.96	9.87
JL018704	HSF	HSF_DNA-bind	-	0.05	7.03	0	0.76	3.45	8.97
JL006223	HSF	HSF_DNA-bind	-	64.22	38.66	83.32	59.51	36.18	61.56
JL011233	HSF	HSF_DNA-bind	-	35.69	11.57	6.26	13.07	4.34	7.9
JL010240	HSF	HSF_DNA-bind	-	17.58	15.66	16.77	16.96	17.83	19.56
JL018716	LIM	LIM	-	82.29	81.23	106.06	91.11	82.38	129.83
JL014115	LIM	LIM	-	52.81	42.79	55.01	43.09	29.01	29.32
JL008720	LIM	LIM	-	39.19	56.6	30.72	21.48	73.9	79.28
JL002476	LIM	LIM	-	358.35	226.39	99.15	275.37	49.14	123.98
JL014727	LIM	LIM	-	19.22	30.69	18.58	11.68	29.43	19.4
JL017518	LIM	LIM	-	0	0.61	0	0.09	93.88	0.74
JL021094	LIM	LIM	-	6.92	14.92	11.11	10.12	8.75	9.25
JL009914	LIM	LIM	-	9.57	10.99	10.17	8.14	6.03	5.27
BGI_novel_G000082	LOB	DUF260	-	0.98	0.62	13.95	5.92	20.3	7.62
BGI_novel_G006527	LOB	DUF260	-	13.42	13.44	7.19	0	0	11.46
JL000689	LOB	DUF260	-	0.2	1.82	2.58	3.18	1.78	4.14
BGI_novel_G003036	LOB	DUF260	-	0.18	0.13	14.63	0.78	11.62	3.63
JL002632	LOB	DUF260	-	10.53	2.34	1.73	5.71	2.83	8.15
JL018417	LOB	DUF260	-	0.48	2.27	1.29	0.52	0.27	0.14
JL003663	LOB	DUF260	-	0	3.09	0	0	0	2.09
JL014585	LOB	DUF260	-	1.23	64.07	7.12	1.5	6.76	6.33
JL027238	LOB	DUF260	-	4.02	6.53	4.4	1.21	0.37	0.7
JL022396	LOB	DUF260	-	50.08	3.62	28.72	88.05	3.1	4.33
JL000138	LOB	DUF260	-	37	16.01	58.48	4.35	2.18	10.77
JL001106	LOB	DUF260	-	0.22	0	0.42	0.64	8.81	3.49
JL001740	LOB	DUF260	-	0.29	38.23	0	0	0	0.57
BGI_novel_G000081	LOB	DUF260	-	0.72	0.13	1.76	3.34	1.18	2.13
JL010051	LOB	DUF260	-	0	0	0	0	95.83	0
BGI_novel_G009494	LOB	DUF260	-	0	0.42	3.24	3.26	3.73	0.35
JL008584	LOB	DUF260	-	103.45	57.78	111.99	233.25	39.52	146.64
JL015042	LOB	DUF260	-	0	0.81	0.15	0.05	99.25	1.12
JL008931	LOB	DUF260	-	0.61	0.26	15.84	1.08	12.1	7.7
BGI_novel_G006529	LOB	DUF260	-	4.15	3.86	2.26	0	0	3.23
JL013975	LOB	DUF260	-	0.83	3.28	1.24	0.41	16.53	2.85
JL014936	LOB	DUF260	-	0.43	10.24	8.49	1.74	4.7	1.22
JL017196	LOB	DUF260	-	0.24	0	8.43	0	4.48	3.79
JL001218	LOB	DUF260	-	2.05	2.29	7.59	1.85	4.4	21.34
JL010425	LOB	DUF260	-	0	0	2.18	0	0	0
JL017592	LOB	DUF260	-	5.31	10.58	4.05	3.63	0	5.3
BGI_novel_G002415	MADS	SRF-TF	-	0.88	0.28	0.46	3.5	0.42	0.53
BGI_novel_G003570	MADS	SRF-TF	-	1.24	0.12	3.8	1.55	0.01	0.01
BGI_novel_G007797	MADS	SRF-TF	-	2.94	13.06	0	0.65	0.39	3.04
BGI_novel_G003677	MADS	SRF-TF	-	1.71	1.41	2.82	1.76	0.25	0.17
JL027101	MADS	SRF-TF	-	0.09	0.18	0.48	3.13	2.5	0.22
JL007656	MADS	SRF-TF	-	36.51	3.28	126.46	28.66	143.1	10.58
BGI_novel_G006547	MADS	SRF-TF	-	0	0	35.09	0	137.42	0
JL023368	MADS	SRF-TF	-	1.03	0.07	548.4	0.22	128.08	0.35
BGI_novel_G010284	MADS	SRF-TF	-	0	2.46	0.65	0	0	0
BGI_novel_G003575	MADS	SRF-TF	-	19.85	0	0.02	0.01	4.42	0
JL027574	MADS	SRF-TF	-	0.15	0.52	0	0	2.71	0.08
JL002315	MADS	SRF-TF	-	0.55	1.41	131.41	2.55	574.12	1.66
JL024620	MADS	SRF-TF	-	0.98	3.22	0	0	0.95	0
JL012585	MADS	SRF-TF	-	62.02	37.24	2.99	97.03	16.44	52.02
JL003390	MADS	SRF-TF	-	5.82	0	0	1.4	1.3	0.33
BGI_novel_G003569	MADS	SRF-TF	-	1.24	0.12	3.8	1.55	0.01	0.01
JL006793	MADS	SRF-TF	-	4.11	0	37.04	2.76	3.46	0
JL011339	MADS	SRF-TF	-	0.59	1.66	2.4	1.05	8.2	0.97
JL003126	MADS	SRF-TF	-	0	2.69	0	0	0.58	1.98
JL021615	MADS	SRF-TF	-	1.81	68.95	8.24	13.01	7.86	5.29
JL011251	MADS	SRF-TF	-	0	0.46	0.72	0	3.75	0.65
BGI_novel_G003574	MADS	SRF-TF	-	19.85	0	0.02	0.01	4.42	0
JL026955	MADS	SRF-TF	-	14.63	20.21	0.25	0.64	31.8	16.72
JL010064	MADS	SRF-TF	-	70.73	54.13	3.24	68.72	13.98	30.77
JL024621	MADS	SRF-TF	-	22.55	21.13	34.2	43.55	55.58	33.44
JL029298	MADS	SRF-TF	-	2.58	6.55	0.09	0.27	9.43	6.16
JL028632	MADS	SRF-TF	-	1.96	1.51	3.23	30.62	9.6	2.77
BGI_novel_G010551	MADS	SRF-TF	-	7.01	2.85	0.99	7.49	5.2	2.05
JL018095	MADS	SRF-TF	-	0	0.31	0.15	0	153.02	76.44
JL027777	MADS	SRF-TF	-	0.32	0.38	6.28	0	1.84	0
BGI_novel_G010288	MADS	SRF-TF	-	3.32	10.01	9.04	9.25	7.78	3.42
JL003391	MADS	SRF-TF	-	103.94	0.29	133.98	11.49	75.82	0.14
JL011966	MADS	SRF-TF	-	0	0	0.84	0.16	12.13	0.13
JL006795	MADS	SRF-TF	-	0.08	0.27	8.83	0.63	0.33	1.61
BGI_novel_G010281	MADS	SRF-TF	-	0.3	5.37	0.92	0.76	3.34	3.64
BGI_novel_G002417	MADS	SRF-TF	-	0.88	0.28	0.46	3.5	0.42	0.53
BGI_novel_G006545	MADS	SRF-TF	-	0	0	8.35	0	13.21	0
JL025996	MADS	SRF-TF	-	23.35	22.35	51.22	44.48	101.38	63.08
BGI_novel_G009689	MADS	SRF-TF	-	6.08	5.94	1.38	1.77	2.98	1.26
JL007191	MADS	SRF-TF	-	0.09	0.07	5.39	0	48.58	0
BGI_novel_G001864	MADS	SRF-TF	-	3.75	15.43	12.23	8.45	9.49	2.59
JL015731	MADS	SRF-TF	-	0	0	0.08	0	3.35	0.07
JL029427	MADS	SRF-TF	-	0	4.03	0.06	0	10.11	7.98
BGI_novel_G002416	MADS	SRF-TF	-	0.88	0.28	0.46	3.5	0.42	0.53
BGI_novel_G007798	MADS	SRF-TF	-	0.47	0	1.83	2.28	0.31	1.26
JL015035	MADS	SRF-TF	-	0	1.41	0.09	0	6.28	2.66
BGI_novel_G010282	MADS	SRF-TF	-	0	0	0	0	6.1	0
BGI_novel_G003572	MADS	SRF-TF	-	19.85	0	0.02	0.01	4.42	0
BGI_novel_G003573	MADS	SRF-TF	-	19.85	0	0.02	0.01	4.42	0
JL010150	MADS	SRF-TF	-	0.97	0.26	415.37	2.7	178.84	0.25
BGI_novel_G003676	MADS	SRF-TF	-	0.21	0	2.18	6.52	5.37	0.51
JL008052	MADS	SRF-TF	-	5.08	69.69	0.72	5.79	5.66	1.38
JL007334	MADS	SRF-TF	-	3.99	2.18	127.77	15.17	92.45	0.37
BGI_novel_G010283	MADS	SRF-TF	-	0.21	1.57	1.06	0.57	8.73	13.42
JL028633	MADS	SRF-TF	-	0.08	0.25	3.76	0.17	0.24	0.86
JL002576	MADS	SRF-TF	-	8.31	0.43	0.35	1.17	14.35	0.34
JL023367	MADS	SRF-TF	-	18.03	13.13	10.79	5.69	2.94	3.07
BGI_novel_G006542	MADS	SRF-TF	-	0	0.18	0	0	20.61	0.06
BGI_novel_G001865	MADS	SRF-TF	-	3.75	15.43	12.23	8.45	9.49	2.59
JL002207	MADS	SRF-TF	-	6.81	0.53	0.66	16.6	0	0.96
JL008997	MADS	SRF-TF	-	0.46	0	26.93	0.19	379.44	0.58
JL028737	MADS	SRF-TF	-	0	0	0	0	2.99	0.08
JL004998	MADS	SRF-TF	-	0	0.29	0.11	0.08	74.39	0
BGI_novel_G003576	MADS	SRF-TF	-	19.85	0	0.02	0.01	4.42	0
JL023213	MADS	SRF-TF	-	5.29	19.87	2.23	6.93	1.16	3.59
BGI_novel_G003571	MADS	SRF-TF	-	1.24	0.12	3.8	1.55	0.01	0.01
JL028752	MADS	SRF-TF	-	2.18	3.47	0.28	5.44	0.09	2.84
BGI_novel_G004446	MADS	SRF-TF	-	0	2.26	0	0	0.34	1.65
JL010221	MADS	SRF-TF	-	13.58	21.35	0.54	6.35	1.13	13.67
JL001502	mTERF	mTERF	-	4.35	5.19	6.59	5.85	7.72	5.21
JL016221	mTERF	mTERF	-	1.52	1.35	3.01	4.51	1.86	1.79
JL008179	mTERF	mTERF	-	3.59	3.16	5.96	5.93	5.14	4.17
JL016359	mTERF	mTERF	-	19.4	18.99	23.18	30.14	12.57	10.29
JL009950	mTERF	mTERF	-	5.91	3.28	12.25	12.21	10.04	5.96
JL003761	mTERF	mTERF	-	10.21	4.47	13.59	11.82	8.38	10.19
JL005328	mTERF	mTERF	-	2.55	5.39	10.55	7.11	7.53	8.13
JL003227	mTERF	mTERF	-	4.88	5.38	4.84	13.31	5.51	7.46
JL016220	mTERF	mTERF	-	1.61	2.57	1.9	1.25	0.91	0.75
JL001791	mTERF	mTERF	-	13.3	9.98	19.68	18.43	25.6	21.06
JL026307	mTERF	mTERF	-	24.47	7.78	38.61	26.13	17.66	26.69
JL018925	mTERF	mTERF	-	6.63	1.6	7.21	6.43	4.74	5.84
JL016358	mTERF	mTERF	-	0	0	0	0	0.02	3.84
JL023036	mTERF	mTERF	-	2.95	4.1	6.92	2.85	5.19	4.56
JL009949	mTERF	mTERF	-	1.1	3.28	4.81	0.7	0.69	1.2
JL018907	mTERF	mTERF	-	61.06	35.21	163.6	309.82	37.13	64.57
JL005326	mTERF	mTERF	-	1	2.32	3.1	2.91	1.98	4.78
JL000920	mTERF	mTERF	-	5.33	5.71	8.91	8.55	11.3	6.92
JL023038	mTERF	mTERF	-	2.19	6.88	7.69	2.78	6.82	8.43
JL005325	mTERF	mTERF	-	3.94	4.49	3.63	3.2	0.91	1.91
JL018503	mTERF	mTERF	-	10.52	7.42	16.86	21.9	11.5	13.72
JL009684	mTERF	mTERF	-	5.46	12.83	15.59	10.96	30.29	20.58
JL001501	mTERF	mTERF	-	9.35	16.03	10.37	10.29	13.19	10.52
JL009216	mTERF	mTERF	-	5.91	7.73	11.84	11.59	9.26	8.93
JL009657	mTERF	mTERF	-	4.6	7.28	5.49	5.21	5.1	5.8
BGI_novel_G010117	mTERF	mTERF	-	4.71	4.97	5.22	3.17	2.96	3.94
JL023037	mTERF	mTERF	-	3.85	5.55	9.89	3.66	6.83	5.32
JL018534	mTERF	mTERF	-	6.51	10.68	10.59	8.71	8.21	9.63
JL008421	mTERF	mTERF	-	8.08	6.57	14.02	11.36	12.4	11.92
JL016222	mTERF	mTERF	-	2.29	3.05	3.66	4.78	1.82	2.1
JL005064	MYB	Myb_DNA-binding	ARID,Response_reg,SNF2_N	3.95	4.63	4.93	4.76	5.65	5.33
JL004218	MYB	Myb_DNA-binding	ARID,Response_reg,SNF2_N	3.81	0.11	0.31	1.72	0.1	0.35
JL008338	MYB	Myb_DNA-binding	ARID,Response_reg,SNF2_N	69.39	10.62	83.37	93.69	3.74	40.7
JL017435	MYB	Myb_DNA-binding	ARID,Response_reg,SNF2_N	0	84.63	0	0	0	1.14
BGI_novel_G007429	MYB	Myb_DNA-binding	ARID,Response_reg,SNF2_N	0.57	1.03	0	0.74	1.82	1.32
BGI_novel_G002905	MYB	Myb_DNA-binding	ARID,Response_reg,SNF2_N	0	0.22	0	6.88	0	0
JL014279	MYB	Myb_DNA-binding	ARID,Response_reg,SNF2_N	0.93	4.87	0.04	0.57	0.04	3.98
JL014716	MYB	Myb_DNA-binding	ARID,Response_reg,SNF2_N	8.11	10.8	13.99	7.8	9.58	7.96
JL017722	MYB	Myb_DNA-binding	ARID,Response_reg,SNF2_N	3.07	15.31	24.53	4.27	8.45	10.24
JL015245	MYB	Myb_DNA-binding	ARID,Response_reg,SNF2_N	7.87	78.61	0.95	3.08	0.45	7.28
JL023288	MYB	Myb_DNA-binding	ARID,Response_reg,SNF2_N	7.83	10.68	2.99	1.43	0.66	3.84
BGI_novel_G002911	MYB	Myb_DNA-binding	ARID,Response_reg,SNF2_N	0	1.25	0.09	0	0	0
JL013418	MYB	Myb_DNA-binding	ARID,Response_reg,SNF2_N	10.97	6.96	11.87	12	10.3	10.78
JL005306	MYB	Myb_DNA-binding	ARID,Response_reg,SNF2_N	19.84	26.08	16.77	10.64	17.96	11.96
JL000565	MYB	Myb_DNA-binding	ARID,Response_reg,SNF2_N	4.87	32.31	29.49	31.34	9.64	17.4
JL006859	MYB	Myb_DNA-binding	ARID,Response_reg,SNF2_N	4.6	0.09	0	3.36	6.51	1.35
JL014508	MYB	Myb_DNA-binding	ARID,Response_reg,SNF2_N	0.29	0.24	6.99	6.67	36.22	56.37
JL004969	MYB	Myb_DNA-binding	ARID,Response_reg,SNF2_N	38.72	32.36	5.78	4.46	0.81	3.29
JL008043	MYB	Myb_DNA-binding	ARID,Response_reg,SNF2_N	17.85	5.37	4.95	3.63	4.93	3.2
JL021720	MYB	Myb_DNA-binding	ARID,Response_reg,SNF2_N	5.3	2.3	5.58	3.75	3.54	3.51
JL007831	MYB	Myb_DNA-binding	ARID,Response_reg,SNF2_N	0.73	0	0.54	0.14	3.53	2.13
JL003973	MYB	Myb_DNA-binding	ARID,Response_reg,SNF2_N	3.88	0.13	0	0.19	9.14	0
JL020313	MYB	Myb_DNA-binding	ARID,Response_reg,SNF2_N	8.37	3.64	22.79	15.01	1.38	3.24
JL014650	MYB	Myb_DNA-binding	ARID,Response_reg,SNF2_N	2.85	4.1	89.01	4.19	8.09	0.91
JL004903	MYB	Myb_DNA-binding	ARID,Response_reg,SNF2_N	35.07	48.39	77.83	64.48	82	48.18
JL004546	MYB	Myb_DNA-binding	ARID,Response_reg,SNF2_N	12.69	20.26	11.9	12.02	22.76	22.36
JL009844	MYB	Myb_DNA-binding	ARID,Response_reg,SNF2_N	1.78	47.16	0.14	2.09	3.76	6.15
JL009845	MYB	Myb_DNA-binding	ARID,Response_reg,SNF2_N	0.73	2.09	0.54	3.77	4.22	14.96
JL016986	MYB	Myb_DNA-binding	ARID,Response_reg,SNF2_N	20.25	6.54	13.74	5.18	13.2	6.76
JL006842	MYB	Myb_DNA-binding	ARID,Response_reg,SNF2_N	0	0.19	0	0	2.46	0
BGI_novel_G002909	MYB	Myb_DNA-binding	ARID,Response_reg,SNF2_N	0	0	0	6.33	3	4.94
JL020659	MYB	Myb_DNA-binding	ARID,Response_reg,SNF2_N	23.7	7.55	4.85	17.24	7.4	7.53
JL011195	MYB	Myb_DNA-binding	ARID,Response_reg,SNF2_N	3.72	4.16	1.02	2.11	0.22	0.08
JL015103	MYB	Myb_DNA-binding	ARID,Response_reg,SNF2_N	133.34	53.99	82.74	58.83	56.9	47.11
JL009692	MYB	Myb_DNA-binding	ARID,Response_reg,SNF2_N	39.72	34.29	12.14	6.81	31.02	6.39
JL015967	MYB	Myb_DNA-binding	ARID,Response_reg,SNF2_N	22.91	7.41	41.76	39.5	26.42	11.33
JL003208	MYB	Myb_DNA-binding	ARID,Response_reg,SNF2_N	0.08	2.88	0.17	0.17	0	1.04
BGI_novel_G007626	MYB	Myb_DNA-binding	ARID,Response_reg,SNF2_N	5.17	5.72	5.95	2.96	1.13	3.13
BGI_novel_G001406	MYB	Myb_DNA-binding	ARID,Response_reg,SNF2_N	0.57	12.8	0	0	0	0
JL018696	MYB	Myb_DNA-binding	ARID,Response_reg,SNF2_N	70.43	59.53	117.39	164.34	65.54	93.52
JL016805	MYB	Myb_DNA-binding	ARID,Response_reg,SNF2_N	0.06	0.78	0.64	0.06	0.56	3.69
JL011787	MYB	Myb_DNA-binding	ARID,Response_reg,SNF2_N	1.46	5.17	2.52	3.11	3.59	4.65
JL008085	MYB	Myb_DNA-binding	ARID,Response_reg,SNF2_N	38.45	17.67	95.67	130.9	17.22	35.05
BGI_novel_G002921	MYB	Myb_DNA-binding	ARID,Response_reg,SNF2_N	8.51	12.14	7.99	1.19	1.95	21.36
BGI_novel_G010691	MYB	Myb_DNA-binding	ARID,Response_reg,SNF2_N	0.59	0.96	23.35	1.28	1.59	0.92
BGI_novel_G002904	MYB	Myb_DNA-binding	ARID,Response_reg,SNF2_N	3.53	4.51	6.39	11.05	0.66	0.88
JL027304	MYB	Myb_DNA-binding	ARID,Response_reg,SNF2_N	0.15	0.95	0.33	0.98	0.72	2.13
JL013767	MYB	Myb_DNA-binding	ARID,Response_reg,SNF2_N	19.91	27.32	0.18	10.87	0.24	24.86
JL000569	MYB	Myb_DNA-binding	ARID,Response_reg,SNF2_N	31.91	49.76	32.87	29.94	44.81	34.08
JL010353	MYB	Myb_DNA-binding	ARID,Response_reg,SNF2_N	1.84	17.82	0.77	1.45	1.18	6.67
JL005466	MYB	Myb_DNA-binding	ARID,Response_reg,SNF2_N	0	19.03	0	0	4.4	6
JL002891	MYB	Myb_DNA-binding	ARID,Response_reg,SNF2_N	0	2.39	0.57	0	1.88	11.59
JL007120	MYB	Myb_DNA-binding	ARID,Response_reg,SNF2_N	0	0	0	0	0	1.31
JL000578	MYB	Myb_DNA-binding	ARID,Response_reg,SNF2_N	24.4	22.37	38.06	37.79	61.32	56.14
JL019270	MYB	Myb_DNA-binding	ARID,Response_reg,SNF2_N	2.75	7.72	1.29	1.98	0.38	0.93
JL011235	MYB	Myb_DNA-binding	ARID,Response_reg,SNF2_N	3.25	4.98	0.9	4.56	0.14	1.45
JL017721	MYB	Myb_DNA-binding	ARID,Response_reg,SNF2_N	13.6	11.3	16.47	16.09	15.56	10.77
JL013677	MYB	Myb_DNA-binding	ARID,Response_reg,SNF2_N	8.93	11.59	9.67	3	22.71	32.91
JL009566	MYB	Myb_DNA-binding	ARID,Response_reg,SNF2_N	11.89	26.88	17.01	15.1	21.95	25.39
JL004099	MYB	Myb_DNA-binding	ARID,Response_reg,SNF2_N	0	32.73	0	0	0	0.43
JL023371	MYB	Myb_DNA-binding	ARID,Response_reg,SNF2_N	12.39	14.36	8.61	9.59	14.7	6.52
JL021214	MYB	Myb_DNA-binding	ARID,Response_reg,SNF2_N	131.02	185.03	133.57	189.64	141.44	154.17
JL004908	MYB	Myb_DNA-binding	ARID,Response_reg,SNF2_N	0.08	5.45	0	1.02	0.15	4.94
JL006426	MYB	Myb_DNA-binding	ARID,Response_reg,SNF2_N	0.79	2.26	0	0.14	0.07	0.87
JL003425	MYB	Myb_DNA-binding	ARID,Response_reg,SNF2_N	50.34	36.17	70.4	69.21	70.08	44.63
BGI_novel_G009345	MYB	Myb_DNA-binding	ARID,Response_reg,SNF2_N	0	0	1.01	0	9.13	0.05
BGI_novel_G002912	MYB	Myb_DNA-binding	ARID,Response_reg,SNF2_N	0.66	0	7.84	0.43	2.78	0
JL003995	MYB	Myb_DNA-binding	ARID,Response_reg,SNF2_N	1.4	21.12	0.22	2.64	0.1	5.64
BGI_novel_G001405	MYB	Myb_DNA-binding	ARID,Response_reg,SNF2_N	0.55	3.02	0.73	0	0	0.12
JL020875	MYB	Myb_DNA-binding	ARID,Response_reg,SNF2_N	0.73	4.61	0.23	0.4	1.22	5.42
JL013547	MYB	Myb_DNA-binding	ARID,Response_reg,SNF2_N	0	0	0	0	39.87	0
BGI_novel_G009346	MYB	Myb_DNA-binding	ARID,Response_reg,SNF2_N	0	0	1.01	0	9.13	0.05
BGI_novel_G003501	MYB	Myb_DNA-binding	ARID,Response_reg,SNF2_N	8.3	11.73	21.56	19.8	22.67	14.09
BGI_novel_G003500	MYB	Myb_DNA-binding	ARID,Response_reg,SNF2_N	17.5	29.07	22.53	23.37	20.56	15.21
JL023134	MYB	Myb_DNA-binding	ARID,Response_reg,SNF2_N	1.45	37.65	1.84	0.67	7.07	7.02
JL012080	MYB	Myb_DNA-binding	ARID,Response_reg,SNF2_N	0.22	0	0.08	0.81	0.15	0.76
JL025852	MYB	Myb_DNA-binding	ARID,Response_reg,SNF2_N	15.5	59.02	1.47	1.95	0.99	5.99
JL013379	MYB	Myb_DNA-binding	ARID,Response_reg,SNF2_N	15.05	2.17	4.28	4.56	7.04	2.61
BGI_novel_G001238	MYB	Myb_DNA-binding	ARID,Response_reg,SNF2_N	1.53	5.98	0.83	0.05	0.1	1.79
JL003410	MYB	Myb_DNA-binding	ARID,Response_reg,SNF2_N	7.48	4.41	3.53	3.1	7.75	8.14
JL008276	MYB	Myb_DNA-binding	ARID,Response_reg,SNF2_N	1.01	0.49	3.36	1.84	1.44	1.63
BGI_novel_G002908	MYB	Myb_DNA-binding	ARID,Response_reg,SNF2_N	0	0.22	0	6.88	0	0
JL017170	MYB	Myb_DNA-binding	ARID,Response_reg,SNF2_N	8.58	17.39	20.59	15.21	23.2	24.9
JL007297	MYB	Myb_DNA-binding	ARID,Response_reg,SNF2_N	130.26	22.82	154.35	57.25	81.61	61.63
JL015708	MYB	Myb_DNA-binding	ARID,Response_reg,SNF2_N	25.62	0.41	20.11	56.62	7.07	5.66
BGI_novel_G009828	MYB	Myb_DNA-binding	ARID,Response_reg,SNF2_N	0.81	0	0	1.76	2.34	0.69
JL008468	MYB	Myb_DNA-binding	ARID,Response_reg,SNF2_N	113.96	4.17	9.23	11.52	9.35	17.06
JL012322	MYB	Myb_DNA-binding	ARID,Response_reg,SNF2_N	528.65	166.55	186.34	140.28	71.21	192.77
JL023295	MYB	Myb_DNA-binding	ARID,Response_reg,SNF2_N	0	2.04	0	0.5	4.95	1.3
JL000427	MYB	Myb_DNA-binding	ARID,Response_reg,SNF2_N	5.75	2.23	15.4	4.79	4.38	9.89
JL022164	MYB	Myb_DNA-binding	ARID,Response_reg,SNF2_N	0.08	0.09	0	0.18	129.44	0
JL020091	MYB	Myb_DNA-binding	ARID,Response_reg,SNF2_N	9.07	10.58	11.86	15.82	5.93	5.39
JL016082	MYB	Myb_DNA-binding	ARID,Response_reg,SNF2_N	0	2.44	0	0	0	0
JL005747	MYB	Myb_DNA-binding	ARID,Response_reg,SNF2_N	8.87	12.71	7.36	5.19	7.08	4.46
JL011558	MYB	Myb_DNA-binding	ARID,Response_reg,SNF2_N	10.47	11.93	12.52	5.4	1.94	5.52
BGI_novel_G002913	MYB	Myb_DNA-binding	ARID,Response_reg,SNF2_N	0.89	2.3	0.58	0	0	0.34
JL000552	MYB	Myb_DNA-binding	ARID,Response_reg,SNF2_N	0.05	0.49	0.37	0.11	0.15	5.36
BGI_novel_G002922	MYB	Myb_DNA-binding	ARID,Response_reg,SNF2_N	6.57	16.36	8.38	13.15	4.15	9.43
JL020831	MYB	Myb_DNA-binding	ARID,Response_reg,SNF2_N	10.03	27.67	8.58	2.04	0.81	1.27
JL004553	MYB	Myb_DNA-binding	ARID,Response_reg,SNF2_N	1.3	12.53	3.91	1.61	2.79	1.79
JL004360	MYB	Myb_DNA-binding	ARID,Response_reg,SNF2_N	0.36	1.96	0.18	0.91	1.06	0.87
JL025277	MYB	Myb_DNA-binding	ARID,Response_reg,SNF2_N	20.45	19.95	23.17	25.17	37.72	22.92
JL017485	MYB	Myb_DNA-binding	ARID,Response_reg,SNF2_N	0.12	1.91	0.25	0.61	4.03	4.04
JL000426	MYB	Myb_DNA-binding	ARID,Response_reg,SNF2_N	0.39	0.35	3.64	5.87	5.68	6.68
JL021719	MYB	Myb_DNA-binding	ARID,Response_reg,SNF2_N	40.93	27.1	24.71	28.38	22.62	19.45
JL010128	MYB	Myb_DNA-binding	ARID,Response_reg,SNF2_N	18.39	31.67	24.23	18.94	15.89	18.05
BGI_novel_G002923	MYB	Myb_DNA-binding	ARID,Response_reg,SNF2_N	6.66	9.21	4.4	8.81	0.31	0.49
JL013678	MYB	Myb_DNA-binding	ARID,Response_reg,SNF2_N	10.37	13.94	10.27	10.45	11.08	10.49
JL014925	MYB	Myb_DNA-binding	ARID,Response_reg,SNF2_N	6.6	28.89	5.85	5.16	0.6	3.19
BGI_novel_G004444	MYB	Myb_DNA-binding	ARID,Response_reg,SNF2_N	4.46	6.54	4.88	6.87	8.87	6.36
JL002047	MYB	Myb_DNA-binding	ARID,Response_reg,SNF2_N	32.24	11.29	0.3	1.69	0	2.79
JL004019	MYB	Myb_DNA-binding	ARID,Response_reg,SNF2_N	15.05	16.58	18.4	14.88	19.67	15.38
JL010136	MYB	Myb_DNA-binding	ARID,Response_reg,SNF2_N	4.89	10.94	0.84	1	0.17	1.17
JL016181	MYB	Myb_DNA-binding	ARID,Response_reg,SNF2_N	3.97	24.28	0.05	1.19	0.05	5.18
JL009893	MYB	Myb_DNA-binding	ARID,Response_reg,SNF2_N	8.71	17.23	61.45	6.84	1.81	8.79
JL015893	MYB	Myb_DNA-binding	ARID,Response_reg,SNF2_N	20.94	60.48	17.18	33.02	14.67	13.4
BGI_novel_G002705	MYB	Myb_DNA-binding	ARID,Response_reg,SNF2_N	19.96	19.02	5.47	17.84	0.96	1.11
JL023704	MYB	Myb_DNA-binding	ARID,Response_reg,SNF2_N	18.82	21.62	24.03	22.31	14.02	21.95
JL004926	MYB	Myb_DNA-binding	ARID,Response_reg,SNF2_N	44.29	30.22	70.91	44.98	149.47	33.81
BGI_novel_G001404	MYB	Myb_DNA-binding	ARID,Response_reg,SNF2_N	3.7	6.12	0	0.36	0.24	0.31
JL020872	MYB	Myb_DNA-binding	ARID,Response_reg,SNF2_N	0.13	1.83	0.13	0	0.49	2.2
JL017922	MYB	Myb_DNA-binding	ARID,Response_reg,SNF2_N	1.18	1.27	0.33	0.2	0.25	0.88
JL003997	MYB	Myb_DNA-binding	ARID,Response_reg,SNF2_N	13.04	17.1	0.2	1.27	0.46	5.13
JL023133	MYB	Myb_DNA-binding	ARID,Response_reg,SNF2_N	0.23	5.4	0.42	0	3.71	2.73
JL001917	MYB	Myb_DNA-binding	ARID,Response_reg,SNF2_N	48.84	37.07	1.57	4.07	0.55	9.78
JL012777	MYB	Myb_DNA-binding	ARID,Response_reg,SNF2_N	0.05	0	0.29	0.16	6.51	0.63
JL008134	MYB	Myb_DNA-binding	ARID,Response_reg,SNF2_N	18.32	19.74	12.06	15.68	13.96	13.63
JL012913	MYB	Myb_DNA-binding	ARID,Response_reg,SNF2_N	0.98	6.98	0	0.06	0	2.15
JL004845	MYB	Myb_DNA-binding	ARID,Response_reg,SNF2_N	6.35	5.88	0.05	1.37	0.05	0.79
JL012466	MYB	Myb_DNA-binding	ARID,Response_reg,SNF2_N	0.69	1.49	0.59	1.08	3.32	0.39
JL001971	MYB	Myb_DNA-binding	ARID,Response_reg,SNF2_N	18.02	4.41	13.2	2.12	3.7	0.44
JL020461	MYB	Myb_DNA-binding	ARID,Response_reg,SNF2_N	14.02	17.02	13.37	11.47	8.48	12.15
JL008964	MYB	Myb_DNA-binding	ARID,Response_reg,SNF2_N	4.94	1.6	5.76	19.82	0.23	1.81
JL009376	MYB	Myb_DNA-binding	ARID,Response_reg,SNF2_N	6.63	9.2	5.45	3.59	0.18	1
JL013732	MYB	Myb_DNA-binding	ARID,Response_reg,SNF2_N	4.39	17.46	0.72	1.79	1.31	2.78
JL014216	MYB	Myb_DNA-binding	ARID,Response_reg,SNF2_N	0.2	2.4	2.05	2.12	0	0.1
JL012803	MYB	Myb_DNA-binding	ARID,Response_reg,SNF2_N	3.67	2.63	0.38	0.55	0.29	0.15
JL009308	MYB	Myb_DNA-binding	ARID,Response_reg,SNF2_N	198.23	3.46	158.95	52.71	7.78	5.28
JL008957	MYB	Myb_DNA-binding	ARID,Response_reg,SNF2_N	0.92	0.49	0	0.57	5.79	2.12
JL010679	MYB	Myb_DNA-binding	ARID,Response_reg,SNF2_N	27.08	30.88	30.09	36	31.01	29.32
JL028169	MYB	Myb_DNA-binding	ARID,Response_reg,SNF2_N	0	5.21	0.36	0.11	0.13	0.07
JL026437	MYB	Myb_DNA-binding	ARID,Response_reg,SNF2_N	7.05	5.94	12.04	4.97	7.95	4.17
JL004272	MYB	Myb_DNA-binding	ARID,Response_reg,SNF2_N	1.61	0.25	1.94	4.92	7.05	2.92
JL019652	MYB	Myb_DNA-binding	ARID,Response_reg,SNF2_N	6.67	46.03	10.37	10.44	10.7	33.05
BGI_novel_G002703	MYB	Myb_DNA-binding	ARID,Response_reg,SNF2_N	1.74	0.94	6.33	2.8	0	0
JL024424	MYB	Myb_DNA-binding	ARID,Response_reg,SNF2_N	0.44	0.39	1.03	1.18	137.23	0.76
JL009786	MYB	Myb_DNA-binding	ARID,Response_reg,SNF2_N	37.92	62.27	28.53	33.03	39.54	33.98
JL025272	MYB	Myb_DNA-binding	ARID,Response_reg,SNF2_N	1.98	0.31	8.78	0.29	29.58	3.25
JL017851	MYB	Myb_DNA-binding	ARID,Response_reg,SNF2_N	1.71	13.68	1.86	4.96	3.52	4.95
JL020631	MYB	Myb_DNA-binding	ARID,Response_reg,SNF2_N	15.38	17.89	13.05	12.03	13.1	7.22
JL022652	MYB	Myb_DNA-binding	ARID,Response_reg,SNF2_N	2.8	0.97	2.58	1.87	0.49	2.28
JL005746	MYB	Myb_DNA-binding	ARID,Response_reg,SNF2_N	11.27	8.51	11.24	8.82	14.87	7.3
JL008867	MYB	Myb_DNA-binding	ARID,Response_reg,SNF2_N	0	33.34	0	0	0	0.54
BGI_novel_G003503	MYB	Myb_DNA-binding	ARID,Response_reg,SNF2_N	0.9	0.9	2.68	1.43	2.39	1.28
JL004079	MYB	Myb_DNA-binding	ARID,Response_reg,SNF2_N	21.46	15.55	25.84	30.96	16.24	19.44
JL014616	MYB	Myb_DNA-binding	ARID,Response_reg,SNF2_N	17.96	20.79	27.95	25.48	34.09	33.26
JL001115	MYB	Myb_DNA-binding	ARID,Response_reg,SNF2_N	5.95	12.45	15.14	16.04	53.26	10.23
JL018526	MYB	Myb_DNA-binding	ARID,Response_reg,SNF2_N	18.92	28.8	27.93	21.41	26	25.99
JL002370	MYB	Myb_DNA-binding	ARID,Response_reg,SNF2_N	57.48	20.31	10.17	12.65	2.17	2.22
JL003996	MYB	Myb_DNA-binding	ARID,Response_reg,SNF2_N	0.23	3.57	0	0.04	0.04	0.73
JL005560	MYB	Myb_DNA-binding	ARID,Response_reg,SNF2_N	19.91	25.24	25.36	28.15	27.26	25.58
JL017341	MYB	Myb_DNA-binding	ARID,Response_reg,SNF2_N	0.6	14.58	3.83	3.52	0.15	5.2
JL021922	MYB	Myb_DNA-binding	ARID,Response_reg,SNF2_N	51.02	29.48	31.3	28.37	83.26	23.29
BGI_novel_G010674	MYB	Myb_DNA-binding	ARID,Response_reg,SNF2_N	0	0	2.46	2.26	0	0.55
JL004436	MYB	Myb_DNA-binding	ARID,Response_reg,SNF2_N	0.09	0.69	3.04	0	332.11	0
BGI_novel_G002704	MYB	Myb_DNA-binding	ARID,Response_reg,SNF2_N	31.83	22.22	131.78	74.78	3.52	41.61
JL010016	MYB	Myb_DNA-binding	ARID,Response_reg,SNF2_N	0.74	16.09	35.98	2.17	276.04	54.13
JL013079	MYB	Myb_DNA-binding	ARID,Response_reg,SNF2_N	211.04	103.13	981.28	506.97	227.12	33.46
JL001872	MYB	Myb_DNA-binding	ARID,Response_reg,SNF2_N	0.32	14.86	0.97	0.43	9.21	10.82
BGI_novel_G001403	MYB	Myb_DNA-binding	ARID,Response_reg,SNF2_N	1.6	1	2.54	1.71	0.32	0
JL007121	MYB	Myb_DNA-binding	ARID,Response_reg,SNF2_N	24.14	37.75	53.65	72.56	27.93	59.21
JL023502	MYB	Myb_DNA-binding	ARID,Response_reg,SNF2_N	14.23	12.61	12.62	11.99	11.58	12.79
JL013460	MYB	Myb_DNA-binding	ARID,Response_reg,SNF2_N	16.01	33.92	21.51	12.95	44.9	20.42
JL022653	MYB	Myb_DNA-binding	ARID,Response_reg,SNF2_N	2.8	2.02	2.58	1.87	0.49	2.28
JL010421	MYB	Myb_DNA-binding	ARID,Response_reg,SNF2_N	0	0.91	0	0	1.18	3.37
JL017521	MYB	Myb_DNA-binding	ARID,Response_reg,SNF2_N	9.95	8.8	25.22	15.33	15.29	4.09
JL029014	MYB	Myb_DNA-binding	ARID,Response_reg,SNF2_N	0	4.57	0.07	0.13	0.06	0.06
JL006948	MYB	Myb_DNA-binding	ARID,Response_reg,SNF2_N	15.09	48.48	39.16	73.52	73.69	67.98
JL014809	MYB	Myb_DNA-binding	ARID,Response_reg,SNF2_N	8.83	4.97	10.22	31.71	61.78	24.13
JL012912	MYB	Myb_DNA-binding	ARID,Response_reg,SNF2_N	0.73	13.22	0.55	0.17	0.31	3.54
JL006405	NAC	NAM	-	0.69	0.98	2.41	0	0.15	0.18
BGI_novel_G008802	NAC	NAM	-	1.01	0.76	0.94	0.44	0	0
JL006504	NAC	NAM	-	183.47	140.17	176.34	205.02	123.52	93.39
JL009517	NAC	NAM	-	0	6.11	0	0	0	0
JL001184	NAC	NAM	-	4.99	2.71	0.67	4.36	0	0.47
JL013644	NAC	NAM	-	3.32	14.13	2.43	1.41	0.21	0.9
JL019042	NAC	NAM	-	22.85	24.03	0.97	9.98	0.87	3.23
JL012857	NAC	NAM	-	0.41	0.04	0.13	0.36	0.17	0.17
JL021649	NAC	NAM	-	3.1	4.25	3.01	1.5	0.63	1.53
JL021650	NAC	NAM	-	9.42	9.04	9.78	4.13	1.57	4.45
JL016342	NAC	NAM	-	0.71	7.55	0.11	2.82	0	1.48
JL018001	NAC	NAM	-	23.43	19.93	31.75	18.8	9.9	9.23
JL009592	NAC	NAM	-	18.33	20.81	13.83	17.46	8.97	21.7
JL020811	NAC	NAM	-	3.5	0.6	10.67	10.84	5.16	6.1
JL004339	NAC	NAM	-	42.02	38.67	36.01	34.49	43.77	42.23
JL013203	NAC	NAM	-	0.14	5.33	0.09	0.05	0	1.14
JL012387	NAC	NAM	-	1.31	3.9	0.96	1.51	0.11	2.86
JL020227	NAC	NAM	-	1.96	3.42	10.56	7.13	5.51	19.11
JL002255	NAC	NAM	-	5.66	7.2	7.01	7.06	5.9	9.16
BGI_novel_G007530	NAC	NAM	-	5.76	0	2.47	1.3	0.31	0
BGI_novel_G010761	NAC	NAM	-	55.52	38.7	20.21	9.87	11.56	5.03
JL013250	NAC	NAM	-	30.23	26.81	22.44	25.57	15.28	18.98
BGI_novel_G007529	NAC	NAM	-	21.81	0.89	6.08	2.68	3.64	5.29
JL015558	NAC	NAM	-	33.84	7.16	10.87	71.72	1.39	41.32
JL001786	NAC	NAM	-	8.09	0.91	0.1	0.72	0	0.1
JL001212	NAC	NAM	-	5.03	0.28	1.1	3.58	0	0.27
JL019586	NAC	NAM	-	202.97	105.32	169.41	86.1	20.1	63.12
JL001183	NAC	NAM	-	2.8	2.13	1.61	2.64	0	0.5
JL009902	NAC	NAM	-	11.6	24.65	60.14	10.81	4.2	5.15
JL020372	NAC	NAM	-	400.29	174.14	60.71	101.45	22.94	56.07
JL013591	NAC	NAM	-	9.79	15.3	0.48	6.1	0.31	2.95
JL018622	NAC	NAM	-	3.59	4.44	0.05	0	0.12	0.1
JL003601	NAC	NAM	-	2.2	13.59	0.36	0.11	0	0.59
JL018340	NAC	NAM	-	0.29	0.99	1.21	0.63	3.15	1.38
JL004353	NAC	NAM	-	44.5	4.89	59.08	43.95	4.11	4.15
JL011794	NAC	NAM	-	3.52	1.74	6.05	3.81	1.6	2.52
JL023026	NAC	NAM	-	139.33	4	21.79	58.51	7.27	40.94
JL006564	NAC	NAM	-	0	3.81	0	0	2.6	4.31
JL005559	NAC	NAM	-	2.18	0.05	3.67	4.16	0.47	1.1
JL022745	NAC	NAM	-	191.17	147.42	59.34	121.38	41.09	24.76
JL010014	NAC	NAM	-	2.31	12.91	77.82	8.62	3.87	7.29
JL022953	NAC	NAM	-	111.2	100.54	63.57	83.34	32.51	50.82
JL020905	NAC	NAM	-	15.84	16.21	19.37	16.98	25.48	18.52
JL004233	NAC	NAM	-	4.76	0.54	1.87	1.35	1.93	0.59
JL015718	NAC	NAM	-	34.01	38.39	39.65	38.77	18	24.07
JL015982	NAC	NAM	-	0.32	0.81	0.51	0.41	4.74	3.64
BGI_novel_G010764	NAC	NAM	-	4.26	0.11	2.22	0	12.09	7.2
JL019806	NAC	NAM	-	5.26	0.51	0.28	1.13	0.63	0.72
JL004358	NAC	NAM	-	224.85	86.32	92.49	138.82	52.44	38.29
BGI_novel_G010919	NAC	NAM	-	1.95	3.98	1.76	0.77	0.73	0.54
JL013357	NAC	NAM	-	40.75	23.14	23.87	30.3	13.61	22.3
JL011602	NAC	NAM	-	810.56	253.44	174.97	102.01	55.43	156.24
JL011648	NAC	NAM	-	7.19	12.42	8.76	3.51	2.65	2.41
JL005053	NAC	NAM	-	8.61	2.89	17.01	3.5	29.77	4.12
JL001126	NAC	NAM	-	40.87	25.92	24.34	40.7	22.1	23.31
JL000965	NAC	NAM	-	20.34	1.15	9.5	5.84	4.64	3.6
BGI_novel_G010920	NAC	NAM	-	18.26	17.62	2	2.55	0	8.35
JL016059	NAC	NAM	-	7.92	1.02	2.51	1.07	2.82	0.86
JL025991	NAC	NAM	-	45.32	18.71	42.81	26.92	40.35	28.89
BGI_novel_G003871	NAC	NAM	-	105.12	112.72	74.51	12.17	3.42	2.29
JL020727	NAC	NAM	-	6.33	40.94	67.67	18.33	2.1	3.38
JL014506	NAC	NAM	-	213.5	137.28	39.9	36.11	12.42	9.27
JL014507	NAC	NAM	-	35.51	58.27	5.97	17.94	1.46	0.93
JL009201	NAC	NAM	-	0.21	1.01	1.07	0.15	1.34	9.87
BGI_novel_G008801	NAC	NAM	-	0.46	1.02	0.88	0.69	0.47	1.24
JL000961	NAC	NAM	-	5.62	0	0.3	0	0	0
JL008770	NAC	NAM	-	1.45	0.49	0.11	7.21	0	0.25
JL019588	NAC	NAM	-	121.82	32.73	48.42	26.81	8.27	8.21
JL023028	NAC	NAM	-	13.67	35.23	3.27	2.03	4.08	6.93
JL020112	NAC	NAM	-	0.29	0.17	1.47	0.79	1.5	2.58
JL010013	NAC	NAM	-	3.49	15.09	9.18	21.81	1.03	9.04
JL012054	NAC	NAM	-	147.14	78.59	67.26	29.84	23.12	27.07
JL011601	NAC	NAM	-	9.9	5.25	9.18	17.66	1.47	2.64
JL003604	NAC	NAM	-	8.21	220	0.31	0.21	0.05	2.72
JL000735	NAC	NAM	-	41.37	27.67	13.46	11.64	16.17	11.66
JL009022	NAC	NAM	-	1.33	10.6	1.97	1.92	6.23	15.56
JL001925	NAC	NAM	-	4.86	8.45	6.31	3.92	0.85	0.79
JL018462	NAC	NAM	-	0.12	34.89	0.13	0	0	5.01
JL000769	NAC	NAM	-	5.81	27.94	3.33	0.94	0.52	1.51
JL007842	NAC	NAM	-	56.82	96.14	143.69	59.68	107.86	41.6
JL009943	NAC	NAM	-	20.84	14.51	56.76	30.77	2.25	6.04
JL006266	NOZZLE	NOZZLE_Angio	-	0	0	0	0	5.24	0.06
JL019837	NOZZLE	NOZZLE_Angio	-	0	10.9	0.05	0.16	0	0.25
BGI_novel_G003191	NOZZLE	NOZZLE_Angio	-	0	2.89	0.19	0	0	0
JL012877	NOZZLE	NOZZLE_Angio	-	0	14.45	0.08	0	0	0
JL001857	NOZZLE	NOZZLE_Angio	-	5.03	22.45	3.09	14.4	1.48	15.11
JL028381	OFP	Ovate	-	0.1	1.39	3.09	0	8.56	5.71
JL014788	OFP	Ovate	-	2.6	26.67	1.91	2.79	2.92	5.71
JL014255	OFP	Ovate	-	0	3.49	0.07	0.22	3.47	4.18
JL012248	OFP	Ovate	-	5.96	23.03	8.17	4.23	3.87	13.96
JL014680	OFP	Ovate	-	4.45	0.72	2.65	34.06	0.83	12.98
JL028380	OFP	Ovate	-	0	8.23	0	0	0	0
JL018661	OFP	Ovate	-	18.32	134.32	3.54	34.95	2.73	66.19
JL029349	OFP	Ovate	-	0.17	16.38	0.38	0.48	2.35	4
JL021551	OFP	Ovate	-	0.78	2.52	7.02	2.36	10.3	12.94
JL014682	OFP	Ovate	-	0.11	0	0.27	4.95	0.12	4.46
JL001790	OFP	Ovate	-	0	0	0.42	0.09	3.9	3.36
JL029676	OFP	Ovate	-	0.12	13.16	1.28	0.25	6.64	4.6
JL003417	OFP	Ovate	-	0	0	0	0	0.4	2.28
JL014256	OFP	Ovate	-	0	0.58	0	1.21	7	0.83
JL004451	OFP	Ovate	-	1.3	0.43	64.51	0.11	187.78	1.32
JL010917	OFP	Ovate	-	7.1	18.9	11.9	7.13	26.25	18.39
JL003421	OFP	Ovate	-	7.19	4.03	3.3	1.9	6.79	21.95
JL010803	OFP	Ovate	-	17.7	10.19	6.56	8.65	0.78	1.69
JL001304	OFP	Ovate	-	0	0.15	0.51	0.08	44.3	0.77
JL012171	PBF-2-like	Whirly	-	115.79	40	137.27	111.82	80.24	60.81
BGI_novel_G001490	PLATZ	PLATZ	-	0	11.18	0.01	12.56	0.13	2.57
BGI_novel_G001101	PLATZ	PLATZ	-	0.07	0.01	12.58	0.15	0.02	0.04
JL003937	PLATZ	PLATZ	-	4.42	38.15	11.49	3.98	19.08	18.05
JL016240	PLATZ	PLATZ	-	56.57	8.69	29.99	64.87	9.97	4.03
BGI_novel_G001489	PLATZ	PLATZ	-	37.91	38.77	17.56	26.7	6.51	14.14
BGI_novel_G001098	PLATZ	PLATZ	-	15.96	3.5	2.77	38.17	7.88	10.44
BGI_novel_G001095	PLATZ	PLATZ	-	21.52	20.29	38.02	29.99	11.09	14.81
JL009471	PLATZ	PLATZ	-	1.83	2.96	4.46	5.74	4.09	2.55
JL015633	PLATZ	PLATZ	-	1.11	10.29	0.31	4.12	6.52	20.77
BGI_novel_G001099	PLATZ	PLATZ	-	0.07	0.01	12.58	0.15	0.02	0.04
BGI_novel_G001100	PLATZ	PLATZ	-	0.07	0.01	12.58	0.15	0.02	0.04
BGI_novel_G001491	PLATZ	PLATZ	-	14.7	0	119.57	204.25	61.74	89.68
BGI_novel_G001496	PLATZ	PLATZ	-	37.07	0	23.67	12.82	0	0.23
BGI_novel_G001488	PLATZ	PLATZ	-	0.16	2.89	2.01	0.44	0	0.03
BGI_novel_G001096	PLATZ	PLATZ	-	21.52	20.29	38.02	29.99	11.09	14.81
JL022635	PLATZ	PLATZ	-	2.25	10.85	0.17	0.96	0.32	3.34
BGI_novel_G001494	PLATZ	PLATZ	-	0.16	2.89	2.01	0.44	0	0.03
JL006953	PLATZ	PLATZ	-	12.08	13.39	16.69	13.13	1.76	1.51
BGI_novel_G001495	PLATZ	PLATZ	-	95.09	4.36	54.16	46.63	52.18	14.49
JL002300	PLATZ	PLATZ	-	0	6.37	0	0	0.93	0.5
BGI_novel_G001097	PLATZ	PLATZ	-	2.07	2.24	7.28	4.37	4.75	1.46
BGI_novel_G001493	PLATZ	PLATZ	-	0.01	0	22.71	2.03	0.02	0.04
BGI_novel_G001487	PLATZ	PLATZ	-	0.16	2.89	2.01	0.44	0	0.03
BGI_novel_G001492	PLATZ	PLATZ	-	312.84	221.26	10.45	43.9	0	64.94
JL019906	RWP-RK	RWP-RK	-	3.74	6.4	8.5	6.5	7.9	6.25
JL027930	RWP-RK	RWP-RK	-	0	0	0	0.05	9.85	0.22
JL004681	RWP-RK	RWP-RK	-	9.63	21.96	11.48	9.22	23.89	15.44
JL020245	RWP-RK	RWP-RK	-	8.02	12.45	14.61	10.66	1.88	7.38
BGI_novel_G010225	RWP-RK	RWP-RK	-	4.98	10.08	5.3	5.59	2.84	5.66
JL008940	RWP-RK	RWP-RK	-	14.7	18.66	15.64	11.03	13.25	8.5
JL007332	SBP	SBP	-	0.08	0.09	0.54	0.09	1.28	2.76
JL019229	SBP	SBP	-	19.81	20.7	19.98	22.74	25.01	29.15
JL013309	SBP	SBP	-	6.73	16.91	4.34	5.28	14.65	13.75
JL016259	SBP	SBP	-	18.93	27.79	16.38	14.55	22.86	16.62
JL020147	SBP	SBP	-	0.17	3.41	0.08	0.48	0.89	2.65
JL001505	SBP	SBP	-	0.59	3	0.83	2.62	0.41	4.75
JL022425	SBP	SBP	-	43.19	51.15	38.96	37.38	31.23	34.52
JL013310	SBP	SBP	-	2.66	0.93	0	0.38	0.26	0.78
JL016030	SBP	SBP	-	7.64	22.13	11.44	13.48	6.33	15.01
JL029935	SBP	SBP	-	0.28	0.47	2.71	3.01	0.79	0.48
JL022764	SBP	SBP	-	0.36	1.15	0.13	1.05	1.94	3.28
JL001590	SBP	SBP	-	18.97	56.04	16.95	19.62	28.95	40.36
JL000034	SBP	SBP	-	0.15	11.9	0	0.2	2.34	6.45
JL029887	SBP	SBP	-	0.56	1.61	1.81	1.25	4.64	0.58
JL010154	SBP	SBP	-	5.86	5.71	5.15	4.75	16.08	10.64
JL000626	SBP	SBP	-	0	0	0	0.48	0.04	2.65
JL018974	SBP	SBP	-	2.48	4.29	1.11	2.28	1.91	2.54
JL002382	SBP	SBP	-	3.53	11.84	4.25	5.3	6.36	6.66
JL018596	SBP	SBP	-	30.67	30.77	38.5	42.67	46.13	38.55
JL004116	SBP	SBP	-	0.76	9.52	6.96	1.16	17.16	10.92
JL000912	Sigma70-like	Sigma70_r2,Sigma70_r3,Sigma70_r4	-	28.97	24.09	31.64	33.07	39.33	40.51
JL012625	Sigma70-like	Sigma70_r2,Sigma70_r3,Sigma70_r4	-	24.51	10.3	33.98	63.34	14.6	26.92
JL014100	Sigma70-like	Sigma70_r2,Sigma70_r3,Sigma70_r4	-	27.32	19.25	34.03	38.09	17.84	21.11
JL003294	Sigma70-like	Sigma70_r2,Sigma70_r3,Sigma70_r4	-	10.69	5.57	29.11	29.62	16.82	15.34
JL000115	Sigma70-like	Sigma70_r2,Sigma70_r3,Sigma70_r4	-	25.76	5.07	41.73	18.93	26.97	5.98
JL006338	SRS	DUF702	-	13.45	11.14	27.35	26.01	32.45	50.23
JL023320	SRS	DUF702	-	51.74	38.23	130.31	127.58	89.43	97.64
JL006361	SRS	DUF702	-	1.57	0.4	0.02	1.06	1.33	8.24
JL007658	SRS	DUF702	-	1.05	0.42	3.39	1	2.05	2.93
JL021010	SRS	DUF702	-	76.11	28.95	12.69	16.1	16.14	58.91
JL009754	SRS	DUF702	-	4.01	0.07	1.72	2.65	1.4	5.03
BGI_novel_G006619	TAZ	zf-TAZ	PHD	0.08	2.01	2.52	2.85	2.97	3.75
JL000705	TAZ	zf-TAZ	PHD	1.17	13.13	9.12	9.49	2.84	1.47
JL009828	TAZ	zf-TAZ	PHD	52.56	2.47	12.7	4.75	3.7	6.4
JL007792	TAZ	zf-TAZ	PHD	41.36	15.74	10.48	7.01	25.08	37.47
BGI_novel_G006617	TAZ	zf-TAZ	PHD	0	0.65	2.6	2.89	1.56	2.95
JL016671	TCP	TCP	-	12.16	29.34	33.25	21.06	27.89	19.17
JL008341	TCP	TCP	-	19.73	14.95	16.91	20.57	13.28	19.91
JL015505	TCP	TCP	-	2.6	0.45	0.58	8.66	1.94	4.94
JL023990	TCP	TCP	-	6.79	12.62	2.31	2.12	7.57	5.29
JL015846	TCP	TCP	-	0.44	0	2.43	5.83	1.82	9.31
JL014290	TCP	TCP	-	0.39	40.64	18.68	5.04	144.09	52.06
JL001713	TCP	TCP	-	16.82	28.21	51.8	50.4	37.71	22.4
JL003402	TCP	TCP	-	0.29	1.47	1.25	0.28	2.43	4.21
JL006418	TCP	TCP	-	10.64	12.48	11.41	29.96	8.41	13.13
JL023991	TCP	TCP	-	2.17	1.63	0.66	0	1.08	1
JL014711	TCP	TCP	-	14.69	29.65	26.36	22.19	25.13	44.46
JL009047	TCP	TCP	-	21.76	28.22	20.36	14.12	31.33	40.22
JL023674	TCP	TCP	-	9.43	4.54	21.21	12.44	34.48	19.93
JL016952	TCP	TCP	-	12.15	6.02	15.68	12.14	11.2	11.98
JL006114	TCP	TCP	-	1.5	2.19	0.3	6.98	7.4	16.61
JL008804	TCP	TCP	-	14.6	20.2	9.82	7.3	6.36	3.46
JL002270	TCP	TCP	-	2.48	6.2	6.79	2.5	12.73	18.4
JL021433	TCP	TCP	-	0.2	1.44	0.84	0.66	5.52	3.33
JL015985	TCP	TCP	-	41.91	79.73	95.24	106.23	123.17	117.64
JL020321	TCP	TCP	-	2.62	11.42	2.42	5.01	10.82	11.35
JL010582	TCP	TCP	-	8.99	10.93	0.92	1.77	11.79	14.23
JL006229	Tify	tify	GATA	63.13	35.58	95.65	73.67	96.41	87.97
JL003758	Tify	tify	GATA	13.15	26.87	13.72	16.49	47.67	38.57
JL007940	Tify	tify	GATA	13.65	3.94	0.31	0.95	0.45	0.91
JL004805	Tify	tify	GATA	77.92	101.73	26.36	48.39	28.85	58.55
JL017040	Tify	tify	GATA	50.5	29.54	49.11	20.31	5.18	5.41
JL017283	Tify	tify	GATA	0.39	2	0.05	0.11	21.42	3.44
JL026356	Tify	tify	GATA	71.02	74.02	62.07	38.19	64.88	50.22
JL017038	Tify	tify	GATA	30.71	12.32	128.29	48.28	164.75	49.7
JL008467	Tify	tify	GATA	24.85	9.52	23.85	3.3	409.13	37.64
JL002958	Tify	tify	GATA	87.89	52.99	88.99	46.46	50.02	73.38
BGI_novel_G002348	Tify	tify	GATA	4.71	0	0	1.65	0.3	2.14
JL025251	Tify	tify	GATA	6.53	17.79	2.26	0.97	0.89	2.3
JL003553	Tify	tify	GATA	396.57	189.51	108.95	46.44	26.28	90.36
JL008394	Tify	tify	GATA	46.41	54	43.55	34.98	52.38	40.98
JL010649	Tify	tify	GATA	47.95	5.08	1.25	0.13	74.16	0.64
BGI_novel_G002345	Tify	tify	GATA	0.79	4.39	3.06	0.97	0	0
JL013779	Tify	tify	GATA	41.2	8.84	2.82	2.36	26.68	3.32
JL002555	Tify	tify	GATA	41.98	43.45	12.91	5.57	8.56	10.29
JL004170	Tify	tify	GATA	115.85	74.79	4.79	0.57	14.19	8.26
JL003769	Tify	tify	GATA	13.76	9.81	0.12	0.13	0.47	0.59
JL017927	TIG	TIG	-	8.15	15.61	12.34	16.61	20.31	18.98
JL023711	TIG	TIG	-	13.08	11.27	12.79	10.91	13.34	5.35
JL017011	TIG	TIG	-	13.73	6.38	35.69	31.06	12.48	17.55
JL001010	TIG	TIG	-	16.98	11.27	15.86	18.32	14.08	13.71
JL012569	TIG	TIG	-	113.73	114.78	106.84	131.1	122.55	106.69
JL015662	Trihelix	trihelix	-	13.32	24.21	40.45	27.01	39.12	18.26
JL009153	Trihelix	trihelix	-	4.23	5.46	6.32	3.96	5.12	6.43
JL014903	Trihelix	trihelix	-	8.77	7.48	6.43	5.11	3.46	3.82
JL003079	Trihelix	trihelix	-	58.83	40.91	43.46	40.34	54.61	58.23
JL012626	Trihelix	trihelix	-	8.62	9.73	7.78	6.48	5.71	4.16
JL000373	Trihelix	trihelix	-	7.95	8.98	3.89	4.72	1.91	0.74
JL023030	Trihelix	trihelix	-	49.2	67.52	51.01	51.25	61.56	39.09
JL014990	Trihelix	trihelix	-	12.84	7.37	10.51	12.61	12.65	10.53
JL007067	Trihelix	trihelix	-	0.3	2.2	0	0	2.29	7.27
JL019532	Trihelix	trihelix	-	49.3	49.91	30.48	34.83	28.76	26.03
JL006072	Trihelix	trihelix	-	51.46	43.64	31.57	32.9	21.06	33.14
JL008541	Trihelix	trihelix	-	23.85	24.52	34.4	26.28	22.02	30.06
JL000470	Trihelix	trihelix	-	19.43	18.42	19.08	23.88	19.39	16.52
JL007955	Trihelix	trihelix	-	4.13	12.64	7.39	14.24	9.63	9.63
JL020650	Trihelix	trihelix	-	31.61	95.5	95.08	47.49	181.38	58.3
JL021007	Trihelix	trihelix	-	3.49	0.48	4.62	6.48	4.01	1.29
JL008045	Trihelix	trihelix	-	25.14	99.89	47.84	44.69	99.87	54.49
JL020984	Trihelix	trihelix	-	11.96	9	20.35	15.14	22.49	18.61
JL003066	Trihelix	trihelix	-	2.66	0.32	0.64	2.67	0	2.44
JL021284	Trihelix	trihelix	-	12.39	11.48	11.93	11.35	11.03	11.57
JL001808	Trihelix	trihelix	-	11.75	5.15	3.72	5.46	4.43	3.65
JL002010	Trihelix	trihelix	-	3.93	6.65	5.13	5.66	4.6	4.9
JL010684	Trihelix	trihelix	-	23.23	31.24	27.26	14.54	34.13	24.16
JL006612	Trihelix	trihelix	-	17.53	17.14	18.33	25.97	19.63	15.3
JL022130	Trihelix	trihelix	-	9.8	9.19	7.23	10.08	9.37	7.9
JL001774	Trihelix	trihelix	-	0.74	0.74	0.72	0.11	9.05	1.35
JL021283	Trihelix	trihelix	-	5.85	7.55	6.85	3.24	7.64	6.54
JL011334	Trihelix	trihelix	-	24.37	24.13	28.36	14.35	56	44.01
JL019572	Trihelix	trihelix	-	12.04	11.67	11.47	13.78	7.31	6.17
JL003065	Trihelix	trihelix	-	4.66	0.66	1.67	4.9	0.09	2.68
JL001809	Trihelix	trihelix	-	39.78	14.17	15.26	20.02	17.44	15.05
JL015235	Trihelix	trihelix	-	10.1	17.88	13.54	6.98	19.46	13
BGI_novel_G002890	Trihelix	trihelix	-	11.78	14.6	23.62	13.71	17.57	15.82
JL007068	Trihelix	trihelix	-	5.99	5.57	7.41	5.49	10.05	4.77
JL017094	Trihelix	trihelix	-	9.23	9.67	12.44	15.77	8.48	8.75
JL022658	TUB	Tub	-	1.12	1.65	0	0.32	0.29	0.16
JL018915	TUB	Tub	-	0.04	9.25	0	0	3.04	8.78
JL018428	TUB	Tub	-	39.59	57.81	45.2	39.26	81.28	62.12
JL017486	TUB	Tub	-	12.32	16.06	14.37	16.5	14.59	14.26
JL001915	TUB	Tub	-	11.29	37.27	5.81	2.78	0.67	2.79
JL018427	TUB	Tub	-	101.94	106.38	54.58	70.71	68.14	86.96
JL002420	TUB	Tub	-	51.6	40.61	48.56	70.85	30.13	42.98
JL021318	TUB	Tub	-	4.15	2.19	2.17	0.65	1.88	3.75
JL022657	TUB	Tub	-	21.02	18.67	20.07	18.68	20.95	20.22
JL017204	TUB	Tub	-	42.2	59.83	44.18	42.35	14.88	38.79
JL007030	TUB	Tub	-	92.61	62.98	78.83	99.23	58.27	77.36
JL005129	ULT	ULT	-	8.15	17.96	7.33	4.62	4.44	4.46
JL009599	ULT	ULT	-	34.61	39.25	19.12	16.51	11.28	13.93
JL005609	VARL	VARL	-	17.69	18.98	8.54	5.91	18.45	15.16
JL002262	VARL	VARL	-	3.95	6.94	5.79	5.4	7.28	5.06
JL011402	VARL	VARL	-	4.58	7.7	6.59	5.34	6.84	9.9
JL004505	VOZ	VOZ	-	16.09	22.27	10.99	3.55	6.29	6.72
JL023871	VOZ	VOZ	-	7.67	11.27	8.41	5.22	3.17	12.95
JL004504	VOZ	VOZ	-	34.53	20.26	27.78	31	24.2	36.16
JL008108	WRKY	WRKY	-	0.04	0.36	0	0.09	33.51	0.35
JL010775	WRKY	WRKY	-	44.36	16.36	16.89	18.85	6.03	10.37
JL002874	WRKY	WRKY	-	31.4	39.77	44.95	46.97	44.75	56.98
JL004869	WRKY	WRKY	-	0.13	0.93	6.79	0.45	18.19	1.75
JL002349	WRKY	WRKY	-	180.13	70.86	40.92	25.58	7.48	26.64
JL024554	WRKY	WRKY	-	18.6	17.95	25.65	21.98	9.26	6.94
JL021873	WRKY	WRKY	-	0.26	0	0	5.21	0	0
JL021929	WRKY	WRKY	-	0	1.77	0.05	0.27	0.1	2.18
JL019832	WRKY	WRKY	-	1.2	1.06	3.01	4.66	1.07	2.75
JL004735	WRKY	WRKY	-	114.07	140.85	49.98	4.72	6.8	24.84
JL000114	WRKY	WRKY	-	28.86	6.13	7.73	2.74	0.62	2.67
JL021185	WRKY	WRKY	-	28.17	19.02	26.78	26.95	48.34	24.82
JL008390	WRKY	WRKY	-	81.81	48.57	93.33	141.58	2.07	5.33
JL020891	WRKY	WRKY	-	47.03	7.18	14.51	16.61	9.28	14.14
JL012300	WRKY	WRKY	-	23.2	16.18	14.74	12.93	11.78	15.92
JL008671	WRKY	WRKY	-	18.91	52.34	3.64	3.54	0.13	2.92
JL008391	WRKY	WRKY	-	93.35	52.43	5.16	17.6	33.74	97.62
JL009740	WRKY	WRKY	-	72.83	63.33	34.08	36.72	23.86	26.22
JL001899	WRKY	WRKY	-	10.7	17.88	14.65	5.59	0.75	2.24
JL000508	WRKY	WRKY	-	163.04	182.41	51.74	61.16	18.82	52.43
JL004118	WRKY	WRKY	-	23.07	2.7	6.18	7.3	7.31	3.95
JL013896	WRKY	WRKY	-	26.88	26.12	19.79	35.2	12.76	23.14
JL000479	WRKY	WRKY	-	14.2	6.34	0	0.34	0	1.84
JL004644	WRKY	WRKY	-	171.34	168.3	140.85	112.66	6.39	71.62
JL024275	WRKY	WRKY	-	42.05	73.1	37.55	34.5	33.22	49.42
JL009398	WRKY	WRKY	-	7.9	19.74	1.82	3.71	2.41	12.59
JL007568	WRKY	WRKY	-	14.66	18.53	14.63	12.75	41.49	16.56
JL011469	WRKY	WRKY	-	5.03	19.08	13.23	16.44	1.45	24.78
JL006878	WRKY	WRKY	-	288.91	105.4	101.24	140.39	5.51	47.45
JL002923	WRKY	WRKY	-	2.05	0.25	0	0.51	0	0
JL018426	WRKY	WRKY	-	8.2	6.96	0.66	1.51	1.78	5.87
JL000653	WRKY	WRKY	-	93.73	41.74	29.02	25.74	24.55	35.58
JL001876	WRKY	WRKY	-	80.58	14.78	17.44	9.1	21.6	26.51
JL024404	WRKY	WRKY	-	27.96	32.41	1.44	20.33	0.6	36.98
JL016779	WRKY	WRKY	-	20.35	1.24	5.68	19.94	1.3	2.08
JL009537	WRKY	WRKY	-	2.08	23.66	8.74	3.85	0.08	1.25
JL011434	WRKY	WRKY	-	30.33	38.47	4.7	4.7	0.08	2.92
JL024553	WRKY	WRKY	-	67.03	19.75	23.65	19.73	2.39	3.24
JL026789	WRKY	WRKY	-	5.96	12.32	5.35	1.71	0.22	4.59
JL012238	WRKY	WRKY	-	21.38	0.27	17.81	24.27	1.53	22.61
JL003467	WRKY	WRKY	-	4.21	1.95	0.78	1.44	0.75	2.34
JL005310	WRKY	WRKY	-	3.65	0	0.18	1.95	2.14	4.31
BGI_novel_G010731	WRKY	WRKY	-	11.85	16.88	5.7	18.7	2.59	7.35
JL002127	WRKY	WRKY	-	70.8	61.08	19.02	10.55	2.88	5.35
JL019276	WRKY	WRKY	-	114.13	46.23	16.87	11.06	1.8	17.93
JL020012	WRKY	WRKY	-	34.54	1.85	20.06	61.52	9.06	13.89
JL000168	WRKY	WRKY	-	14.77	2.1	11.7	1.42	0.07	0.26
JL005234	WRKY	WRKY	-	259.72	225.46	133.5	116.06	13.66	69.52
JL000481	WRKY	WRKY	-	4.28	0.34	0.76	0.45	0	0
JL016617	WRKY	WRKY	-	828.34	41.98	88.89	187.16	3.89	54.09
JL022028	WRKY	WRKY	-	22.04	62.8	15.87	36.82	2.65	10.79
JL025607	WRKY	WRKY	-	0.12	4.19	0	0	4.26	5.2
JL017667	WRKY	WRKY	-	3.26	1.98	0.24	3.4	0.03	1.17
JL006677	WRKY	WRKY	-	75.53	35.34	63.78	84.77	17.68	38.05
JL011175	WRKY	WRKY	-	11.73	13.78	5.42	17.86	1.89	5.09
JL024884	zf-HD	ZF-HD_dimer	-	9.93	0	10.52	7.48	9.7	15.7
JL010225	zf-HD	ZF-HD_dimer	-	0	0	2.01	0.87	2.04	8.12
JL016834	zf-HD	ZF-HD_dimer	-	4.96	14.67	6.98	3.66	5.07	3.18
JL019117	zf-HD	ZF-HD_dimer	-	0.28	0	4.75	3.39	5.85	8.72
JL001400	zf-HD	ZF-HD_dimer	-	0.14	3.18	0	0.31	0.29	4.04
JL023336	zf-HD	ZF-HD_dimer	-	0.1	0.11	9.22	0.59	2.55	1.8
JL024205	zf-HD	ZF-HD_dimer	-	0.27	6.63	2.51	0.2	0.46	1.01
JL018735	zf-HD	ZF-HD_dimer	-	0.63	0.34	11.75	6.49	26.66	21.32
JL025653	zf-HD	ZF-HD_dimer	-	1.9	0.41	8.05	2.42	3.18	14.1
JL001402	zf-HD	ZF-HD_dimer	-	12.57	26.22	12.14	6.08	56.46	13.83
JL022710	zf-HD	ZF-HD_dimer	-	3.27	1.43	2.59	27.3	4.02	7.84
JL023789	zf-HD	ZF-HD_dimer	-	42.02	3.68	113.01	108.14	25.51	27.33
BGI_novel_G009539	zf-HD	ZF-HD_dimer	-	0	4.18	1.38	0.13	0.5	0.99
JL024493	zf-HD	ZF-HD_dimer	-	0.69	0	5.51	8.77	22.22	14.68

## Sheet: Sheet3
	Supplementary Table 3 The blast results of flower- or tissue-specific TFs
Gene ID	Name	Description	Scientific Name	Common Name	Taxid	Query Cover	E value	Per. ident	Acc. Len	Accession
JL012330	AP2	Cymbidium goeringii AP2-3 mRNA, complete cds	Cymbidium goeringii	NA	112607	1	0	99.47	1449	KX347445.1
JL004255	DREB-like	Cymbidium sinense clone comp40040_c0_seq1 dehydration-responsive element-binding DREB-like protein mRNA, partial cds	Cymbidium sinense	1083	1083	0.99	0	0.9966	754	MG702183.1
JL003457	RAP2-like	Cymbidium sinense clone comp2488_c0_seq1 ethylene-responsive transcription factor RAP2-like protein mRNA, complete cds	Cymbidium sinense	1491	1491	1	0	0.9549	1672	MG702181.1
BGI_novel_G002989	ARF7	Cymbidium sinense auxin response factor 7-like mRNA isoform X1 mRNA, complete cds	Cymbidium sinense	3825	5295	0.97	0	0.9934	3818	MK414290.1
JL016757	MYC4-like	Cymbidium sinense transcription factor MYC4-like isoform X1 mRNA, complete cds	Cymbidium sinense	617	2045	1	7e-172	0.9941	1506	MK307580.1
JL007632	HEC3-like	Cymbidium goeringii transcription factor HEC3-like isoform X1 mRNA, partial cds	Cymbidium goeringii	852	1158	1	0	0.9915	782	MK302405.1
JL003408	ZAT9	Cymbidium ensifolium zinc finger protein ZAT9-like isoform X2 mRNA, partial cds	Cymbidium ensifolium	1308	1308	0.64	0	0.9852	931	MK470671.1
JL023313	30-kDa	Cymbidium ensifolium 30-kDa cleavage and polyadenylation specificity factor 30-like isoform X1 mRNA, complete cds	Cymbidium ensifolium	2004	2654	0.75	0	0.9982	1117	MK673730.1
JL004829	APRR2	Cymbidium ensifolium two-component response regulator-like APRR2 isoform X2 mRNA, complete cds	Cymbidium ensifolium	1783	2335	0.91	0	0.991	2445	MK861773.1
JL019162	Knotted-1-like 3	PREDICTED: Phalaenopsis equestris homeobox protein knotted-1-like 13 (LOC110024018), mRNA	Phalaenopsis equestris	1435	1435	1	0	0.8951	1651	XM_020723732.1
JL007656	AP3-2	Cymbidium faberi APETALA3-like protein 3_2 (AP3_2) mRNA, complete cds	Cymbidium faberi	754	1113	1	0	0.9928	1203	MT295097.1
JL006793	AGL6	Cymbidium faberi AGL6 mRNA, complete cds	Cymbidium faberi	326	326	0.27	3e-84	0.989	913	HM208534.1
JL003391	SEP2.	Cymbidium goeringii SEP2 mRNA, complete cds	Cymbidium goeringii	1330	1330	1	0	0.9919	738	KX347447.1
JL010150	SEP3.	Cymbidium goeringii SEPALLATA3 (SEP3) mRNA, complete cds	Cymbidium goeringii	1153	1153	0.99	0	0.982	732	KF924272.1
JL003973	MYB30-like	PREDICTED: Dendrobium catenatum transcription factor MYB30-like (LOC110094698), mRNA	Dendrobium catenatum	782	782	0.98	0	0.8449	1337	XM_020819992.2
JL016986	Telomere repeat-binding protein 2-like	PREDICTED: Dendrobium catenatum telomere repeat-binding protein 2-like (LOC110108901), mRNA	Dendrobium catenatum	235	235	0.12	2e-56	0.8408	2803	XM_020839756.2
JL007297	MYBS2-like	PREDICTED: Dendrobium catenatum transcription factor MYBS2-like (LOC110107768), mRNA	Dendrobium catenatum	749	749	0.96	0	0.8372	1287	XM_020838140.2
JL005746	MAMYB	PREDICTED: Dendrobium catenatum transcription factor MAMYB (LOC110094470), mRNA	Dendrobium catenatum	845	845	0.99	0	0.8333	1208	XM_020819723.2
JL004233	NAC1	PREDICTED: Dendrobium catenatum NAC domain-containing protein 71 (LOC110107694), transcript variant X1, mRNA	Dendrobium catenatum	699	1001	0.86	0	0.92	1977	XM_020838030.2
JL016059	NAC22-like	PREDICTED: Dendrobium catenatum NAC domain-containing protein 22-like (LOC114580353), mRNA	Dendrobium catenatum	1072	1072	0.99	0	0.8933	1231	XM_028697601.1
JL025991	NAC17	PREDICTED: Dendrobium catenatum NAC domain-containing protein 17 (LOC110097190), transcript variant X3, mRNA	Dendrobium catenatum	1136	1669	0.63	0	0.8441	2454	XM_020823446.2
JL004451	OPF12-like	PREDICTED: Phalaenopsis equestris transcription repressor OFP12-like (LOC110034653), mRNA	Phalaenopsis equestris	387	387	0.84	1e-102	0.8237	863	XM_020738903.1
JL013350	Os01g0723500-like	Cymbidium sinense B3 domain-containing protein Os01g0723500-like isoform X1 mRNA, complete cds	Cymbidium sinense	1884	1884	1	0	0.9676	1317	MK414304.1
BGI_novel_G002999	ARF1	Cymbidium goeringii ARF1 mRNA, complete cds	Cymbidium goeringii	316	994	0.47	3e-81	1	2049	OL412398.1
JL023352	ARR11	Arabidopsis thaliana response regulator 11 (ARR11), mRNA	Arabidopsis thaliana	207	207	0.23	3e-48	0.7649	2193	NM_105439.3
JL011550	BPC2-like	PREDICTED: Dendrobium catenatum protein BASIC PENTACYSTEINE2-like (LOC110111556), mRNA	Dendrobium catenatum	1048	1048	0.91	0	0.8679	1364	XM_028692851.1
JL016411	bHLH18	PREDICTED: Dendrobium catenatum transcription factor bHLH18 (LOC110115484), mRNA	Dendrobium catenatum	994	994	1	0	0.8599	1246	XM_020848731.2
JL015498	bHLH130-like	Cymbidium sinense transcription factor bHLH130-like isoform X2 mRNA, partial cds	Cymbidium sinense	1969	1969	1	0	0.9936	1255	MK307520.1
JL008229	bHLH086	Cymbidium sinense putative transcription factor bHLH086 isoform X1 mRNA, complete cds	Cymbidium sinense	1310	1310	1	0	0.9779	997	MK307605.1
JL001606	SPATULA-like	Cymbidium goeringii transcription factor SPATULA-like isoform X1 mRNA, complete cds	Cymbidium goeringii	1701	1701	1	0	0.9947	1490	MK302335.1
JL017914	COL12	Erycina pusilla CONSTANS-like 12 (COL12) mRNA, complete cds	Erycina pusilla	248	248	0.26	1e-60	0.8127	1020	KC836895.1
JL010053	Indeterminate-domain 11	PREDICTED: Dendrobium catenatum protein indeterminate-domain 11 (LOC110107615), mRNA	Dendrobium catenatum	1358	1358	0.99	0	0.8416	2373	XM_020837906.2
JL006619	CCCH53	PREDICTED: Dendrobium catenatum zinc finger CCCH domain-containing protein 53 (LOC110109009), transcript variant X2, misc_RNA	Dendrobium catenatum	2111	2111	1	0	0.874	2656	XR_002304525.2
JL026871	PCL1	Cymbidium ensifolium transcription factor PCL1-like isoform X6 mRNA, complete cds	Cymbidium ensifolium	455	862	0.95	3e-123	1	1227	MK861817.1
JL016275	EFM-like	Cymbidium ensifolium myb family transcription factor EFM-like isoform X4 mRNA, partial cds	Cymbidium ensifolium	1585	1585	0.75	0	0.9988	1140	MK861824.1
JL022659	Uncharacterized	PREDICTED: Dendrobium catenatum uncharacterized LOC110104535 (LOC110104535), transcript variant X2, mRNA	Dendrobium catenatum	1537	1537	1	0	0.8651	1976	XM_028701486.1
JL027303	KAN4	Cymbidium ensifolium putative transcription factor KAN4 isoform X1 mRNA, complete cds	Cymbidium ensifolium	889	889	0.95	0	0.9979	1369	MK861807.1
JL015204	SCL32	Cymbidium ensifolium scarecrow-like protein 32-like mRNA, partial cds	Cymbidium ensifolium	1332	2695	0.91	0	0.9945	1269	MH789952.1
BGI_novel_G006309	HSF	PREDICTED: Dendrobium catenatum heat stress transcription factor B-2b (LOC110106983), mRNA	Dendrobium catenatum	662	662	0.97	0	0.8432	1480	XM_020837098.2
JL010064	AP1	Cymbidium goeringii AP1/FUL2 mRNA, complete cds	Cymbidium goeringii	1336	1336	1	0	0.9986	726	KX347441.1
JL010221	SVP-like	Maxillaria aurea short vegetative phase-like 2A protein mRNA, partial cds	Maxillaria aurea	948	948	0.36	0	0.9143	699	MZ673192.1
JL014279	MYB36	PREDICTED: Dendrobium catenatum transcription factor MYB36-like (LOC110095224), mRNA	Dendrobium catenatum	545	687	0.63	2e-150	0.9368	1178	XM_020820669.2
JL003995	MYB13	Phalaenopsis aphrodite subsp. formosana MYB13 (MYB13) mRNA, complete cds	Phalaenopsis aphrodite subsp. formosana	636	636	0.72	1e-177	0.8735	909	MZ504998.1
JL012080	MYB306	Cymbidium sinense clone comp34606_c0_seq1 myb-related protein 306-like protein mRNA, partial cds	Cymbidium sinense	616	1171	0.93	2e-171	1	840	MG702115.1
BGI_novel_G002922	Uncharacterized	PREDICTED: Dendrobium catenatum uncharacterized LOC110110710 (LOC110110710), transcript variant X10, mRNA	Dendrobium catenatum	1674	1674	0.61	0	0.8832	1699	XM_028699338.1
JL016181	RAX3-like	PREDICTED: Phalaenopsis equestris transcription factor RAX3-like (LOC110037481), mRNA	Phalaenopsis equestris	948	948	0.97	0	0.8568	1247	XM_020742138.1
JL020872	MYB306	Cymbidium ensifolium clone ZHLZ.comp52625_c0_seq1 myb-related protein 306-like isoform X3 mRNA, complete cds	Cymbidium ensifolium	1179	1440	1	0	0.9894	1133	MK282499.1
JL017851	MYB59-like	PREDICTED: Phalaenopsis equestris transcription factor MYB59-like (LOC110026685), transcript variant X2, mRNA	Phalaenopsis equestris	697	697	0.99	0	0.8522	1229	XM_020727732.1
JL016342	FEZ-like	PREDICTED: Dendrobium catenatum protein FEZ-like (LOC110114298), transcript variant X1, mRNA	Dendrobium catenatum	1546	1546	1	0	0.8999	3763	XM_020847135.2
JL018462	NAC76-like	PREDICTED: Dendrobium catenatum NAC domain-containing protein 76-like (LOC110108485), mRNA	Dendrobium catenatum	979	979	0.78	0	0.9017	753	XM_020839154.2
JL001857	SPEAR3-like	PREDICTED: Phalaenopsis equestris protein SPEAR3-like (LOC110020961), mRNA	Phalaenopsis equestris	494	494	1	5e-135	0.853	480	XM_020719269.1
JL018661	OFP1	PREDICTED: Dendrobium catenatum transcription repressor OFP1 (LOC110101504), mRNA	Dendrobium catenatum	1114	1114	0.98	0	0.8947	1150	XM_020829418.2
JL014682	OFP1-like	PREDICTED: Phalaenopsis equestris transcription repressor OFP1-like (LOC110034860), mRNA	Phalaenopsis equestris	322	322	0.41	4e-83	0.85	1069	XM_020739099.1
BGI_novel_G001490	Uncharacterized	PREDICTED: Dendrobium catenatum uncharacterized LOC110093171 (LOC110093171), mRNA	Dendrobium catenatum	1258	1258	1	0	0.8933	1654	XM_020817976.2
JL015633	Uncharacterized	PREDICTED: Phalaenopsis equestris uncharacterized LOC110021485 (LOC110021485), mRNA	Phalaenopsis equestris	846	846	0.86	0	0.8958	1345	XM_020719993.1
BGI_novel_G010225	NLP3	PREDICTED: Dendrobium catenatum protein NLP3 (LOC110115879), transcript variant X1, mRNA	Dendrobium catenatum	1243	1243	0.57	0	0.8663	3263	XM_028692969.1
JL001505	SPL6	Arabis alpina SQUAMOSA promoter binding protein-like protein 6 (SPL6) gene, complete cds	Arabis alpina	54.7	54.7	0.1	0.02	0.7791	2054	KC815953.1
JL016030	SPL12	PREDICTED: Phalaenopsis equestris squamosa promoter-binding-like protein 12 (LOC110039299), transcript variant X6, mRNA	Phalaenopsis equestris	1327	1407	0.98	0	0.8495	2153	XM_020744316.1
JL011469	WRKY49	Cymbidium ensifolium putative WRKY transcription factor 49 mRNA, complete cds	Cymbidium ensifolium	1803	1803	1	0	0.993	1293	MF067547.1
